# Supplementary material for: Syntheses of mGluR5 PET radioligands through the radiofluorination of diaryliodonium tosylates
Source: Royal Society of Chemistry journal article supplement (doi:10.1039/c1ob05555k), 2011-01-01

## Electronic Supplementary Information

### Syntheses of mGluR5 PET Radioligands through the Radiofluorination of Diaryliodonium Tosylates

Sanjay Telu, Joong-Hyun Chun, Fabrice G. Siméon, Shuiyu Lu, and Victor W. Pike\*

Molecular Imaging Branch, National Institute of Mental Health, National Institutes of Health, Rm. B3 C346A, 10 Center Drive, Bethesda MD 20892-1003, USA.

E-mail: pikev@nih.gov; Fax: +1 301 480 5112; Tel: +1 301 594 5986.

|                                                                                   |       |
|-----------------------------------------------------------------------------------|-------|
| <b>Appendix 1.</b> $^1\text{H}$ , $^{19}\text{F}$ and $^{13}\text{C}$ NMR spectra | 2–38  |
| <b>Appendix 2.</b> Selected radio-HPLC chromatograms                              | 39–50 |

## Appendix 1. $^1\text{H}$ , $^{19}\text{F}$ and $^{13}\text{C}$ NMR spectra

### Compound 5a

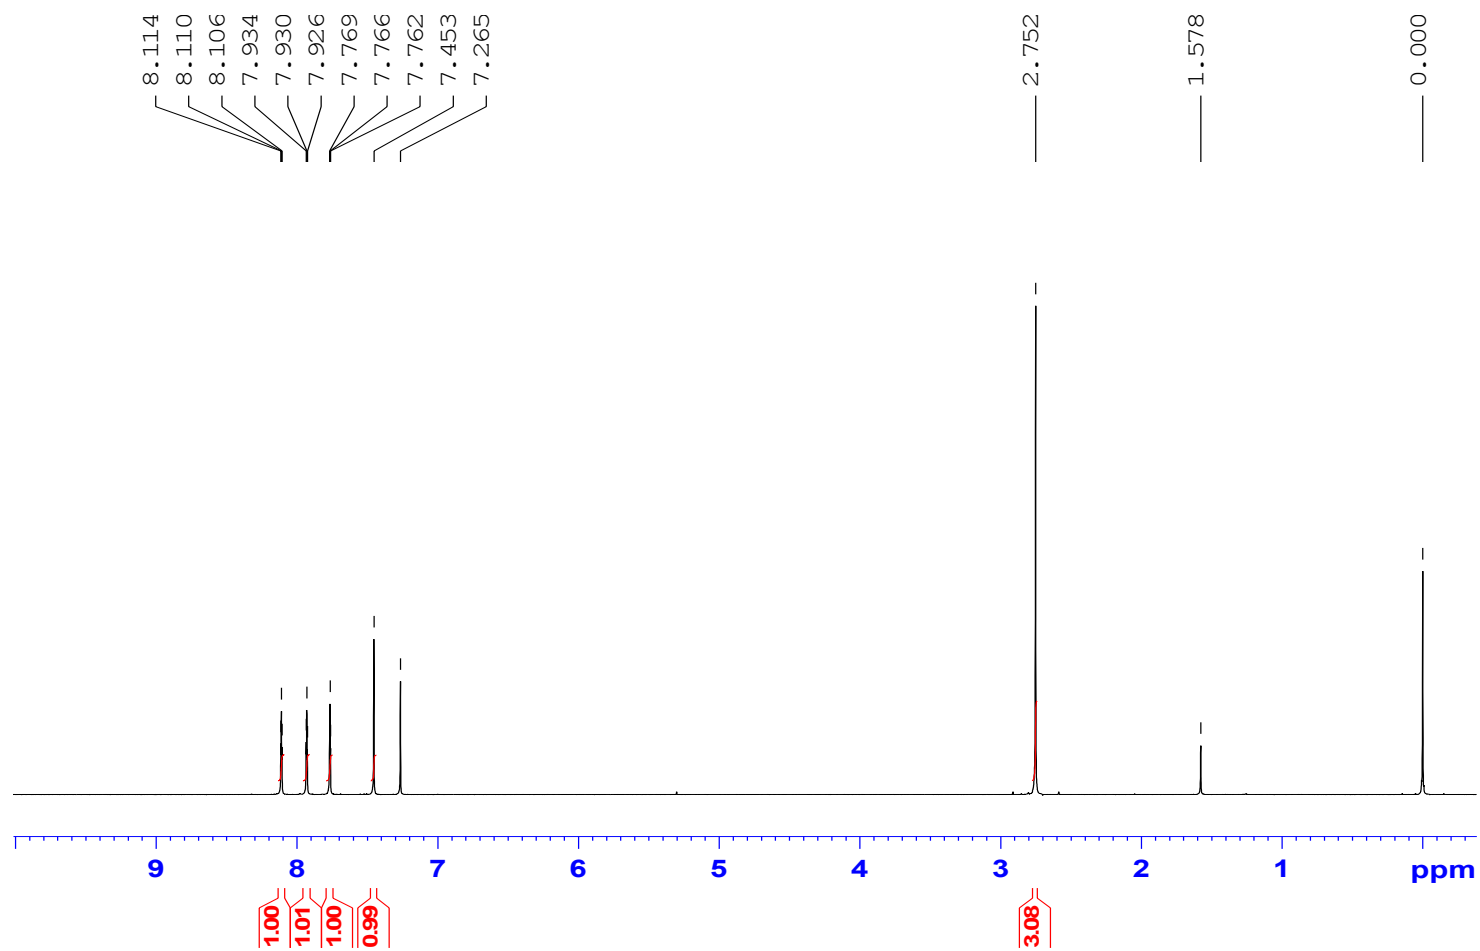

### Compound 5a

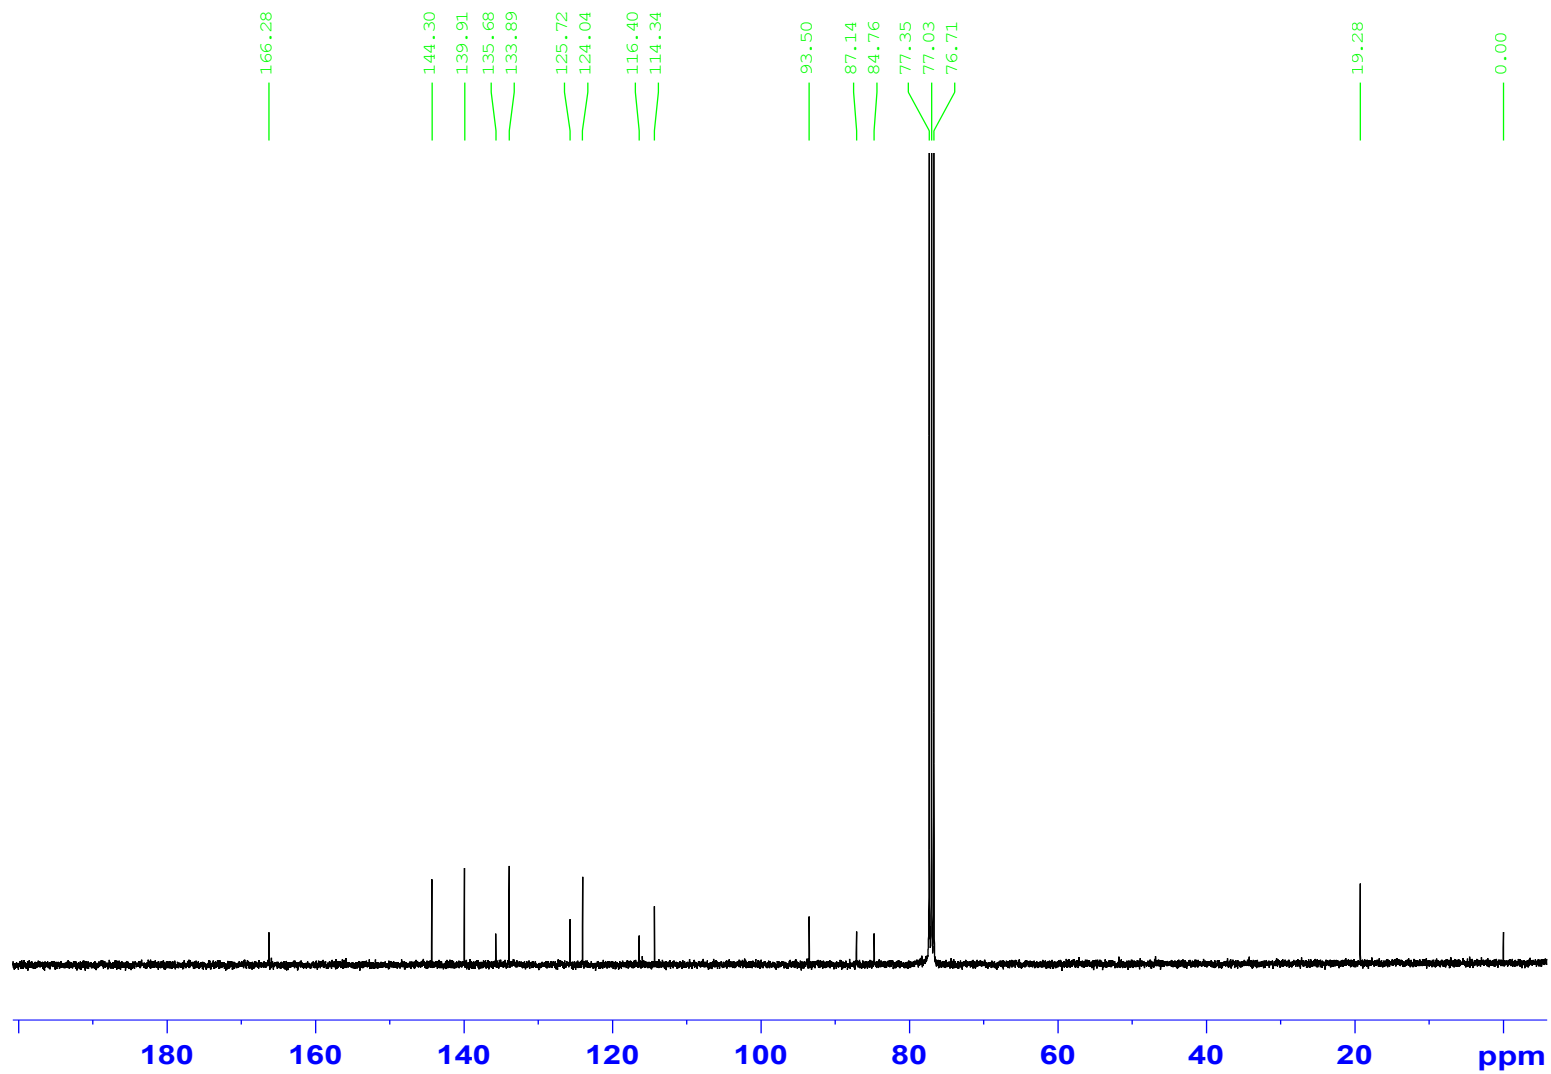

Compound **5b**

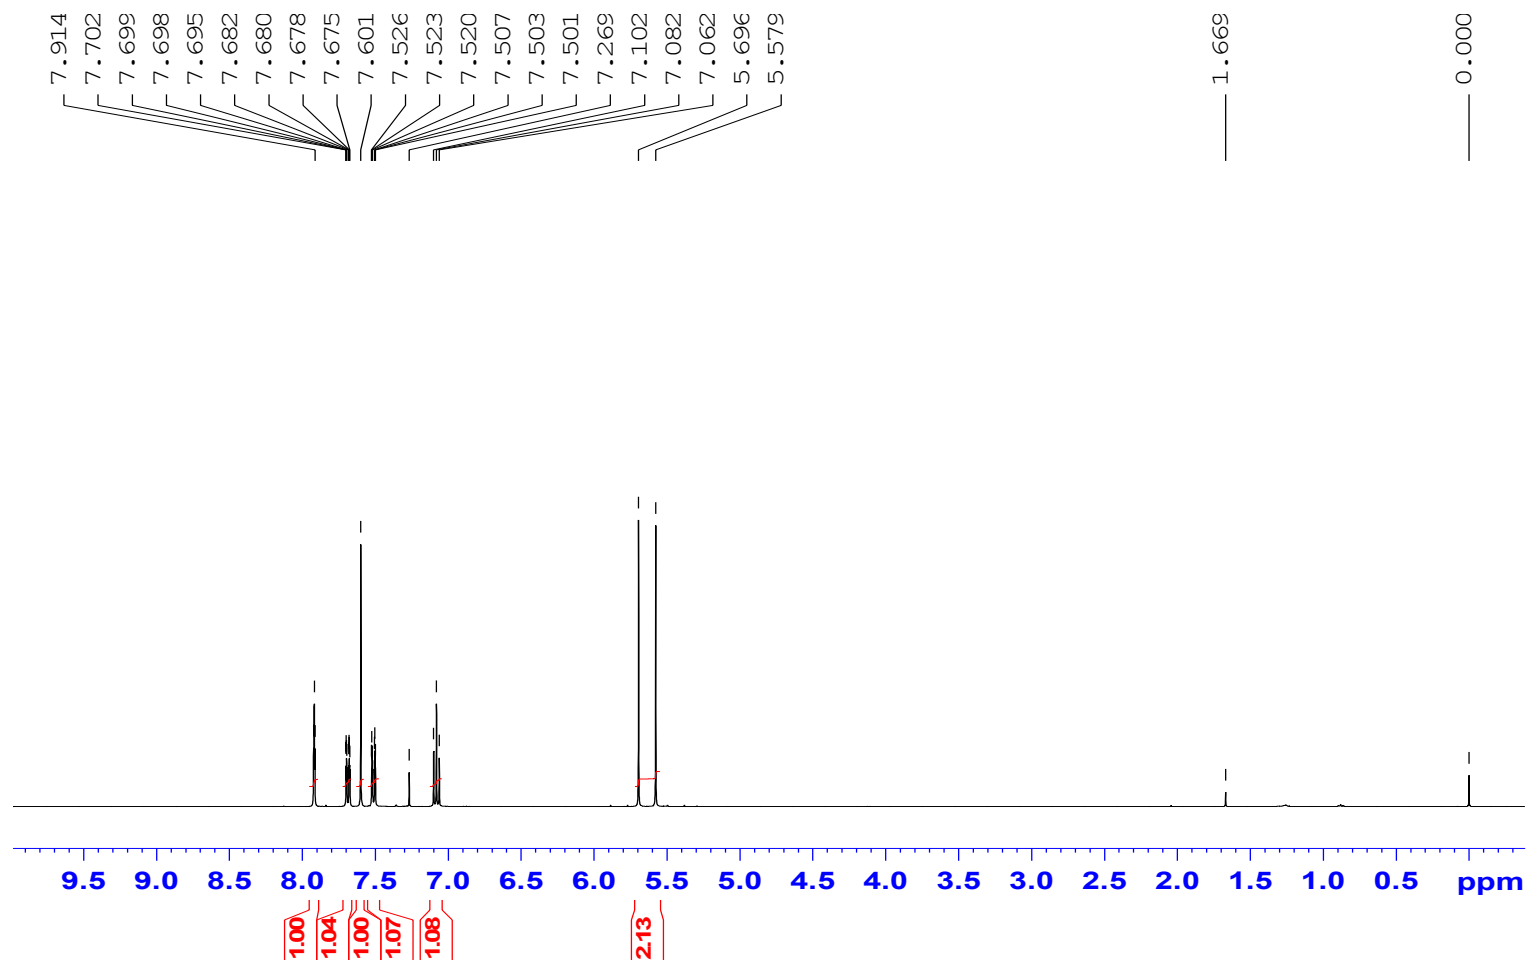

Compound **5b**

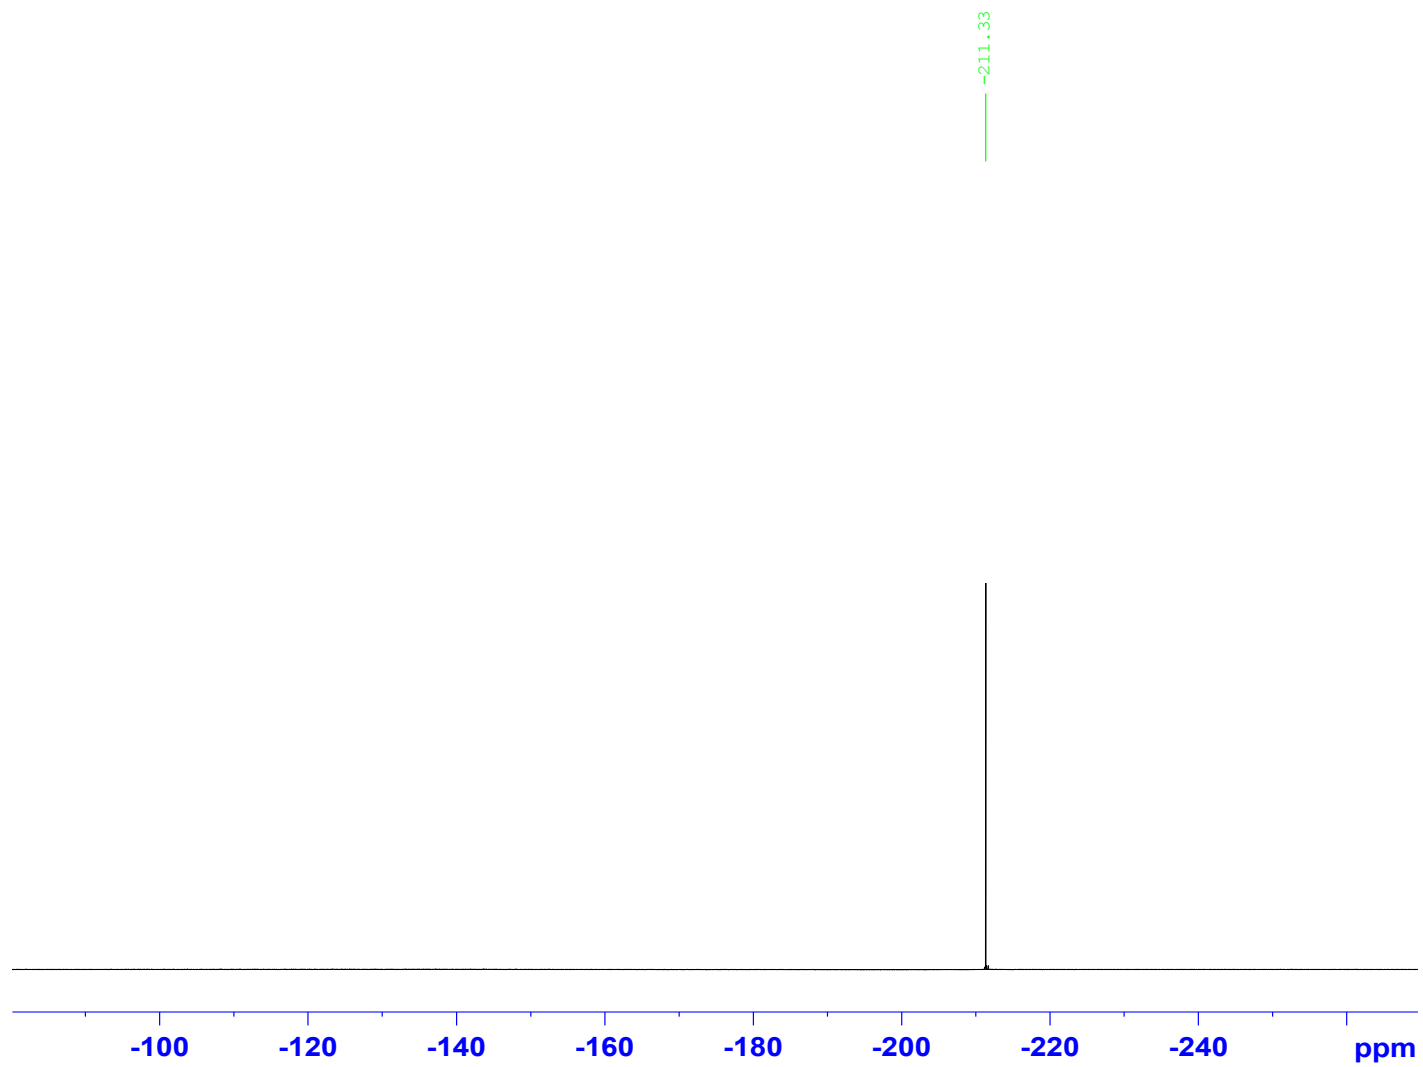

Compound **5b**

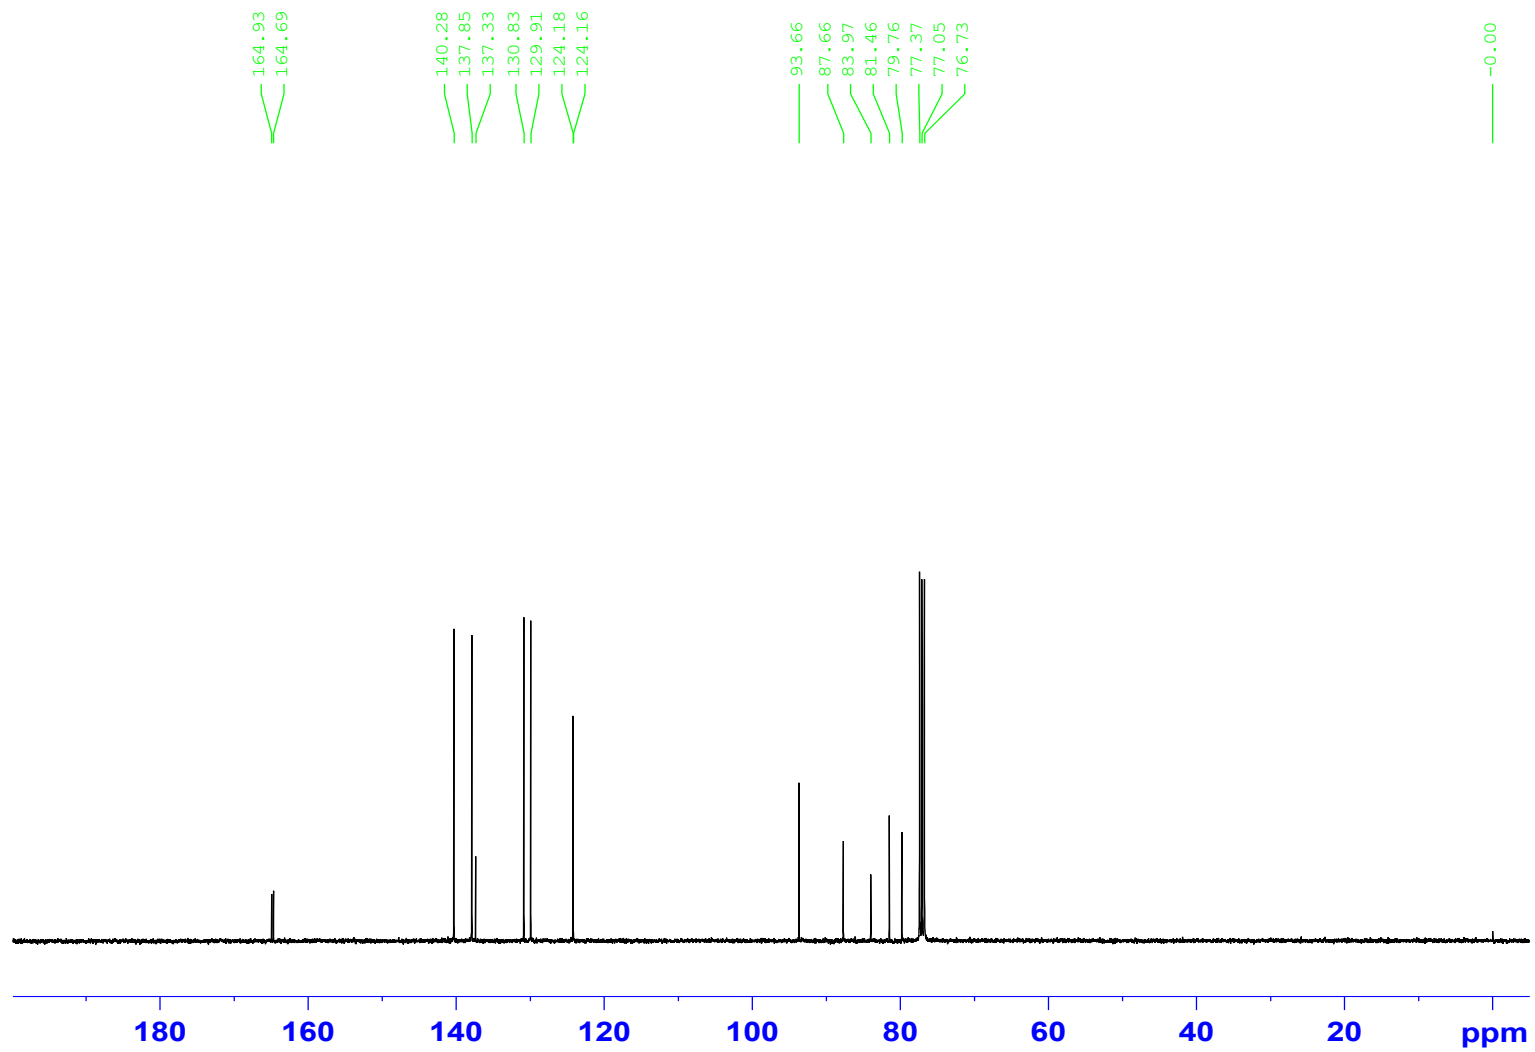

Compound **5c**

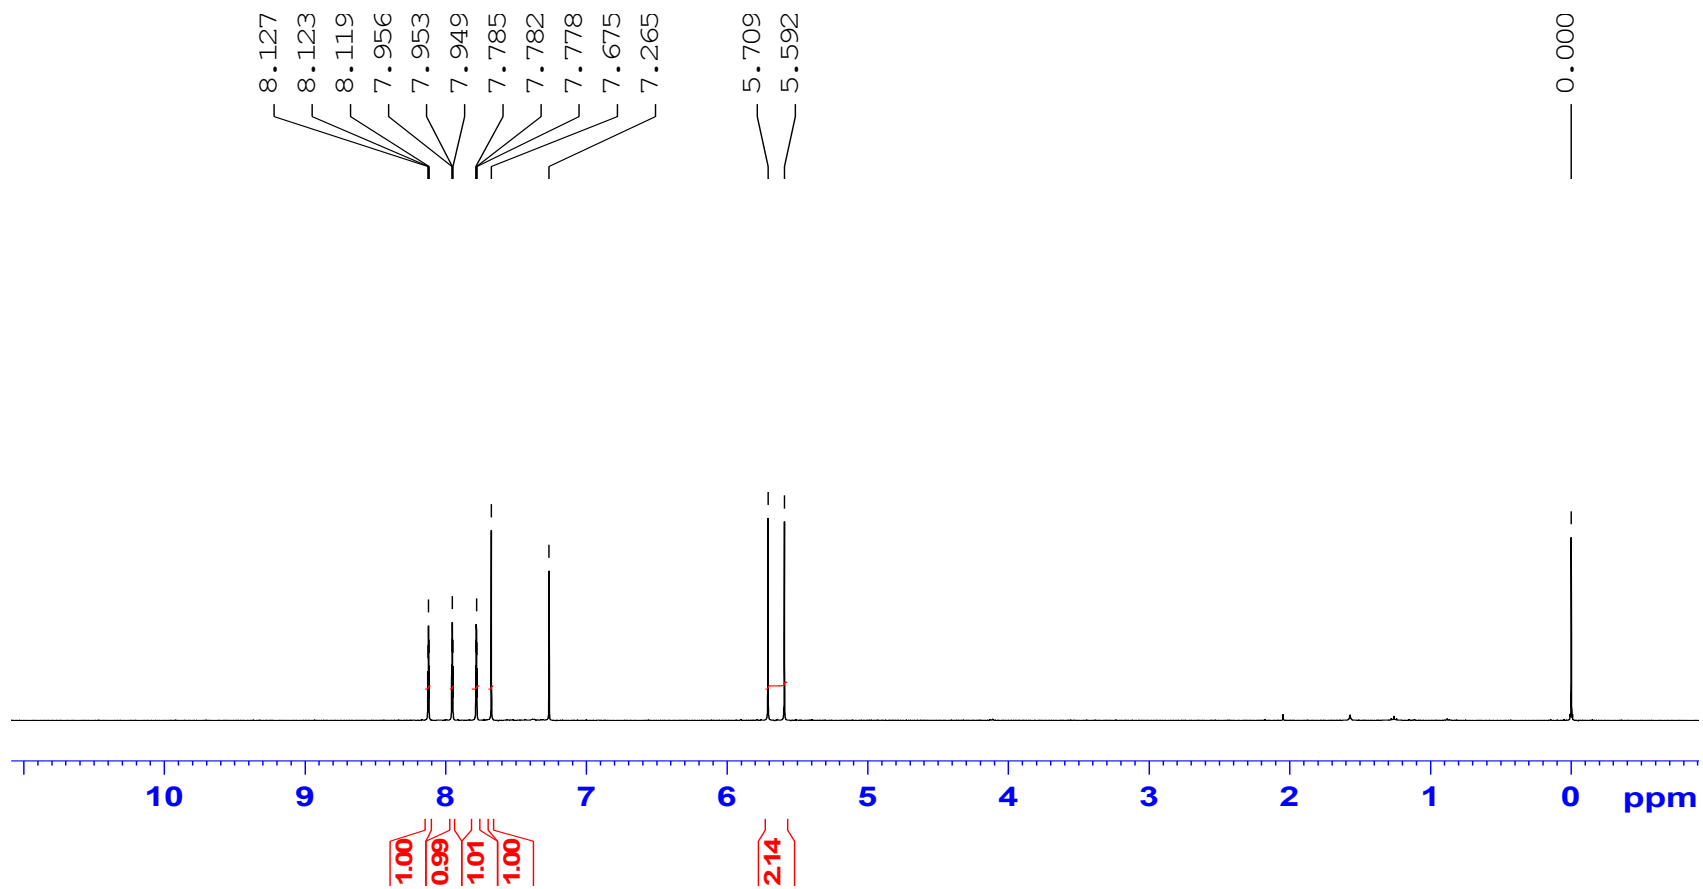

Compound **5c**

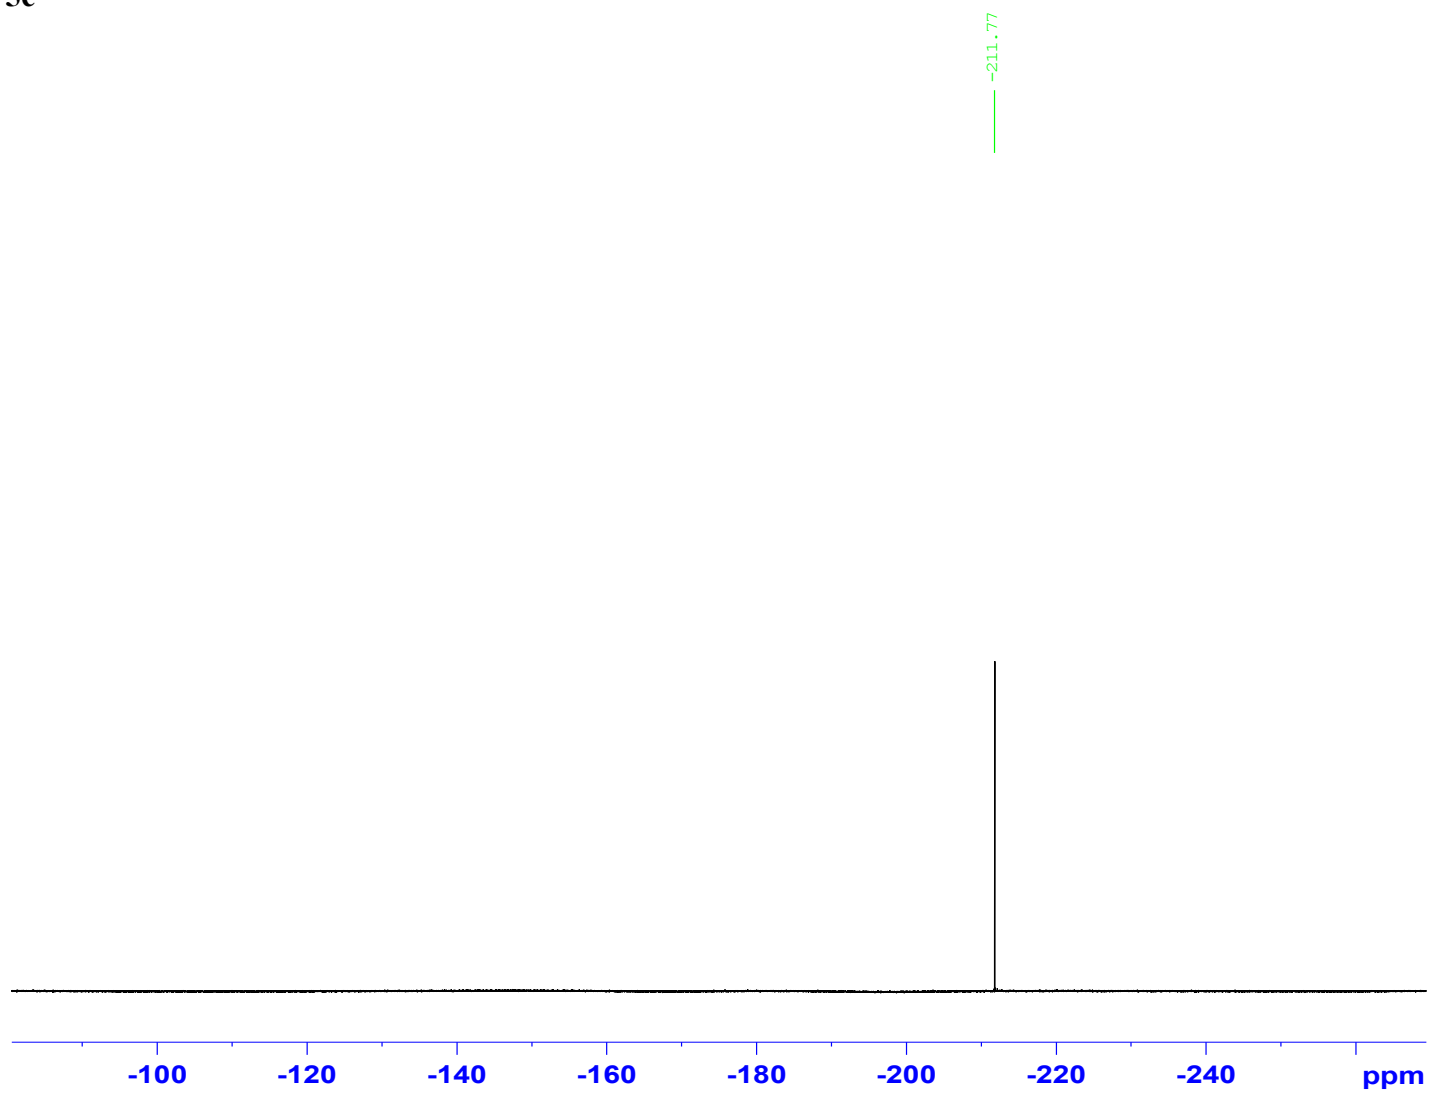



### Compound 5c

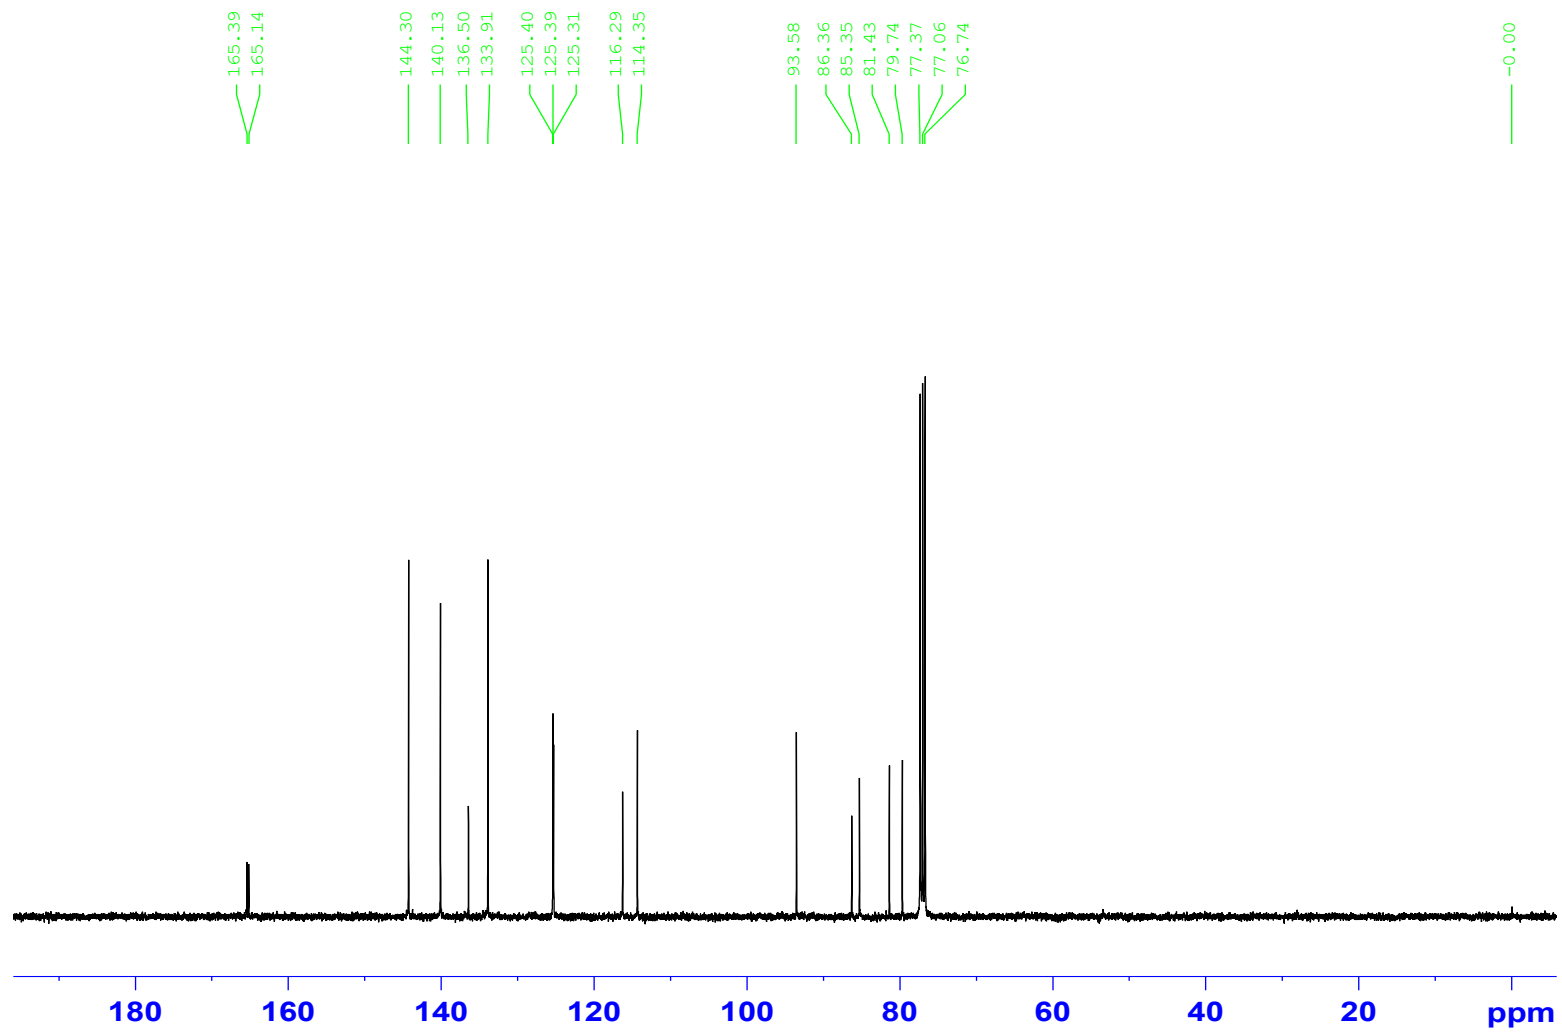

Compound **5d**

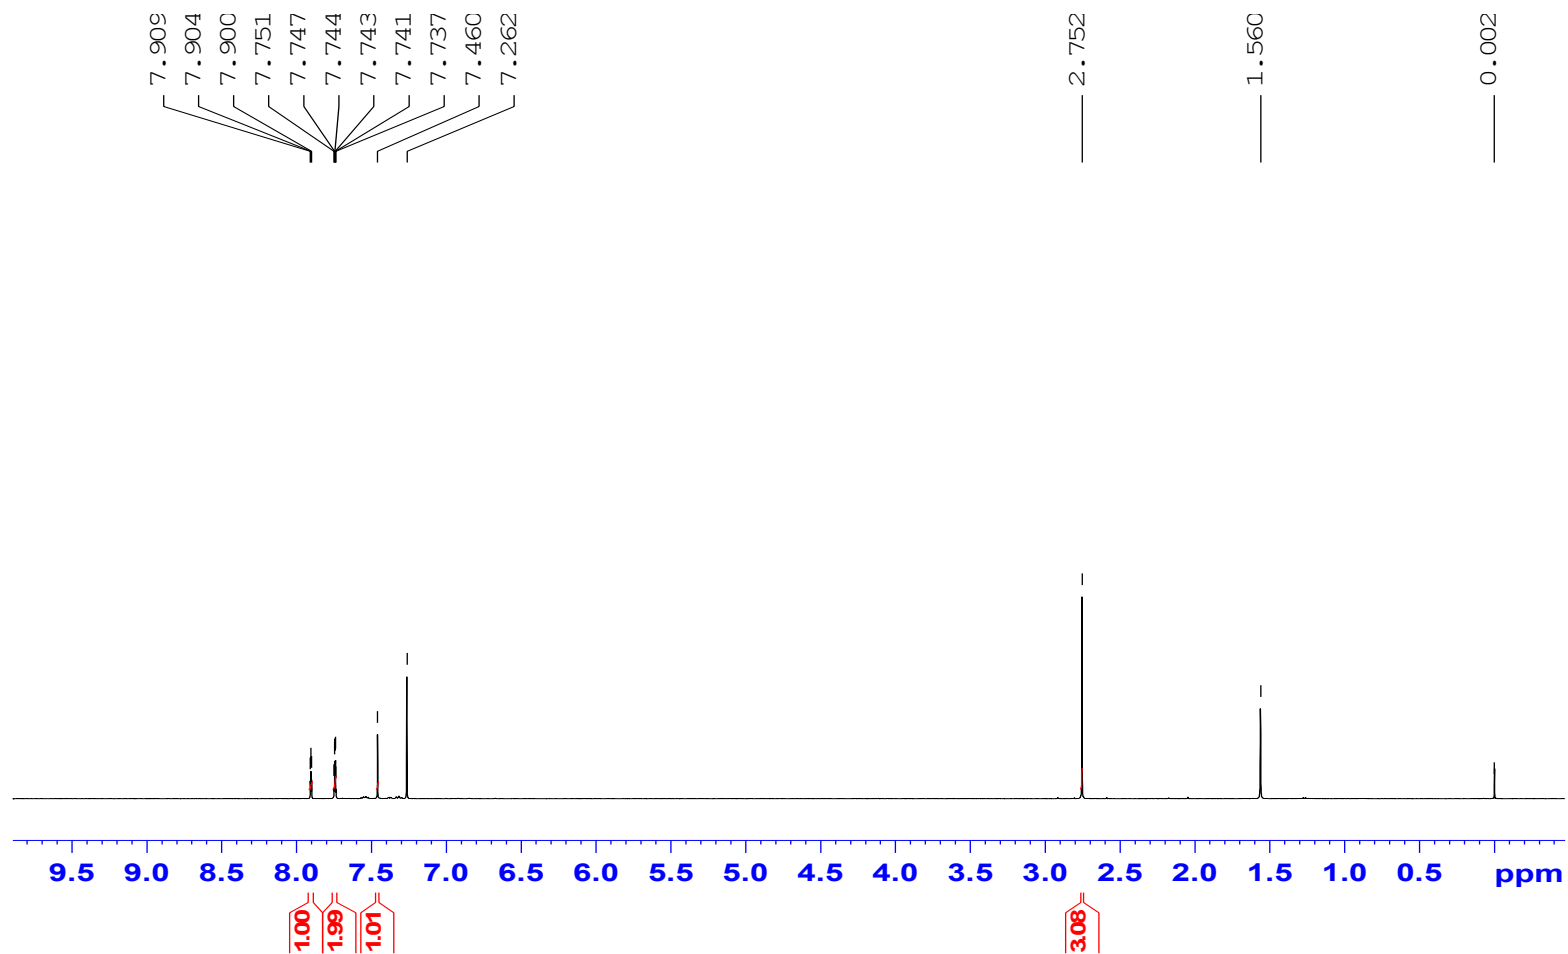

Compound **5d**

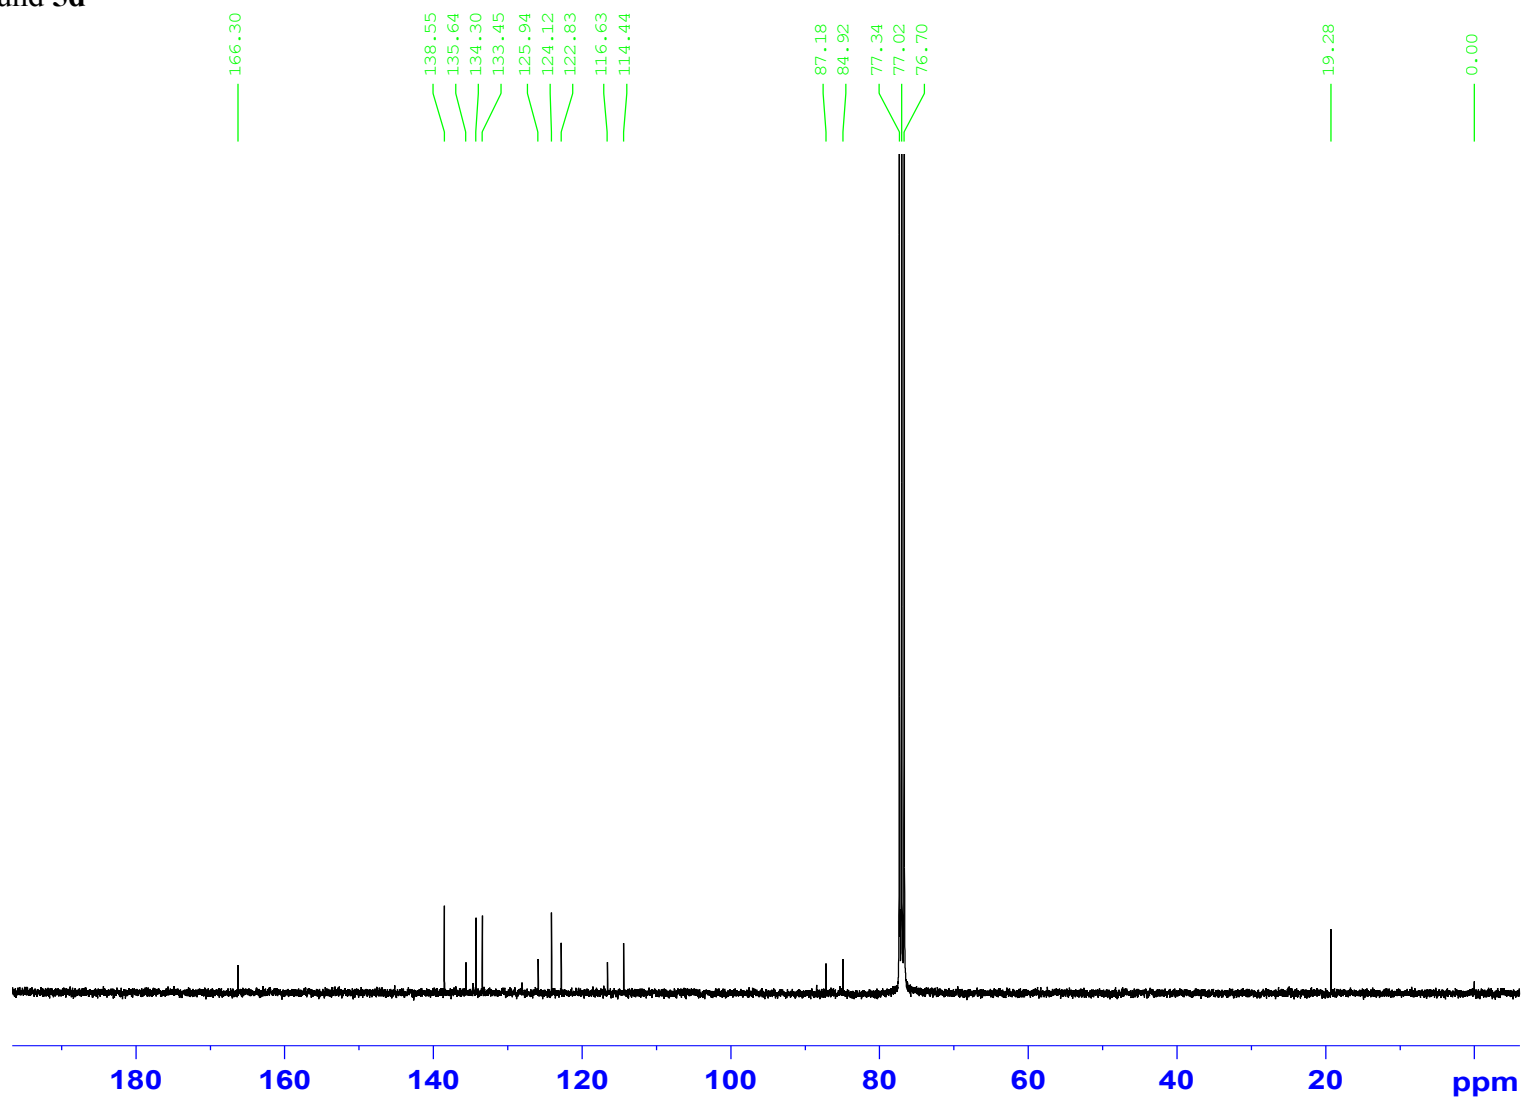

Compound **5e**

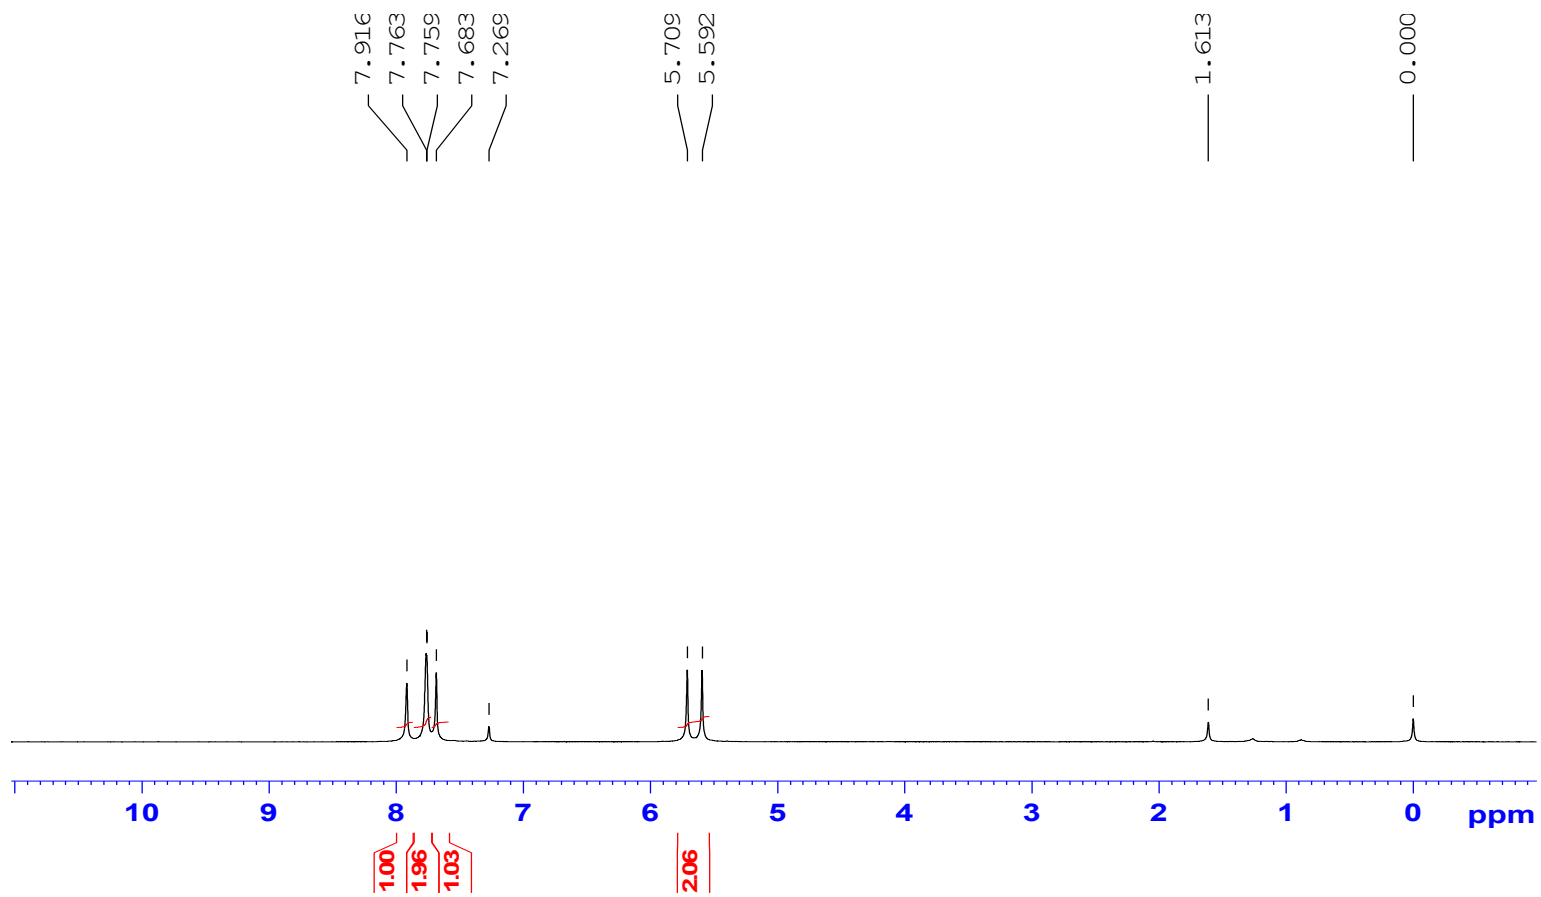

### Compound 5e

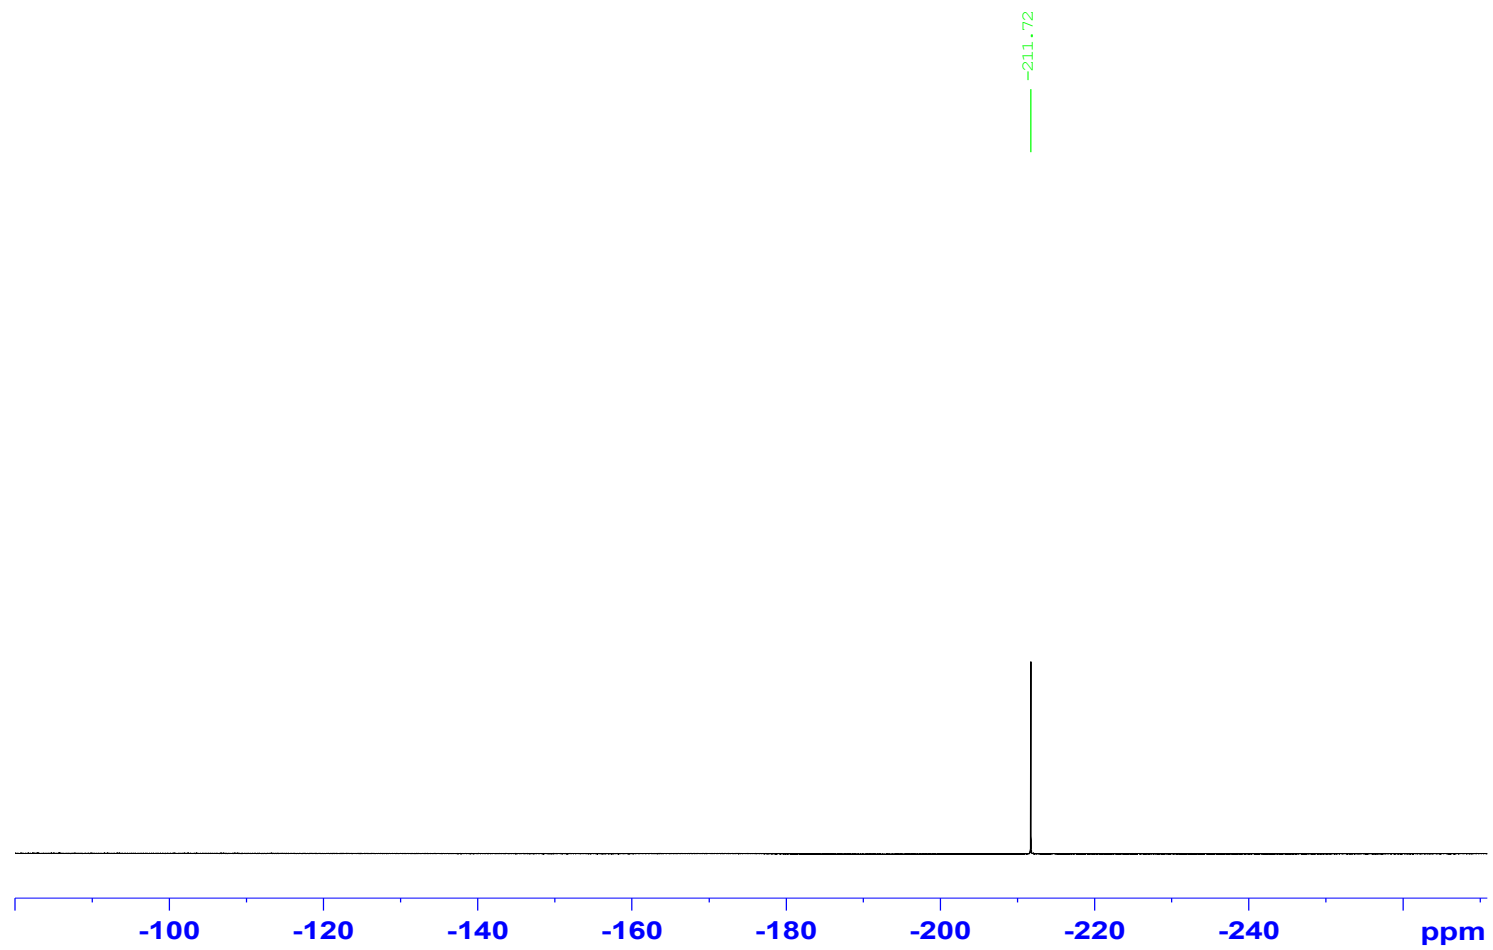

### Compound 5e

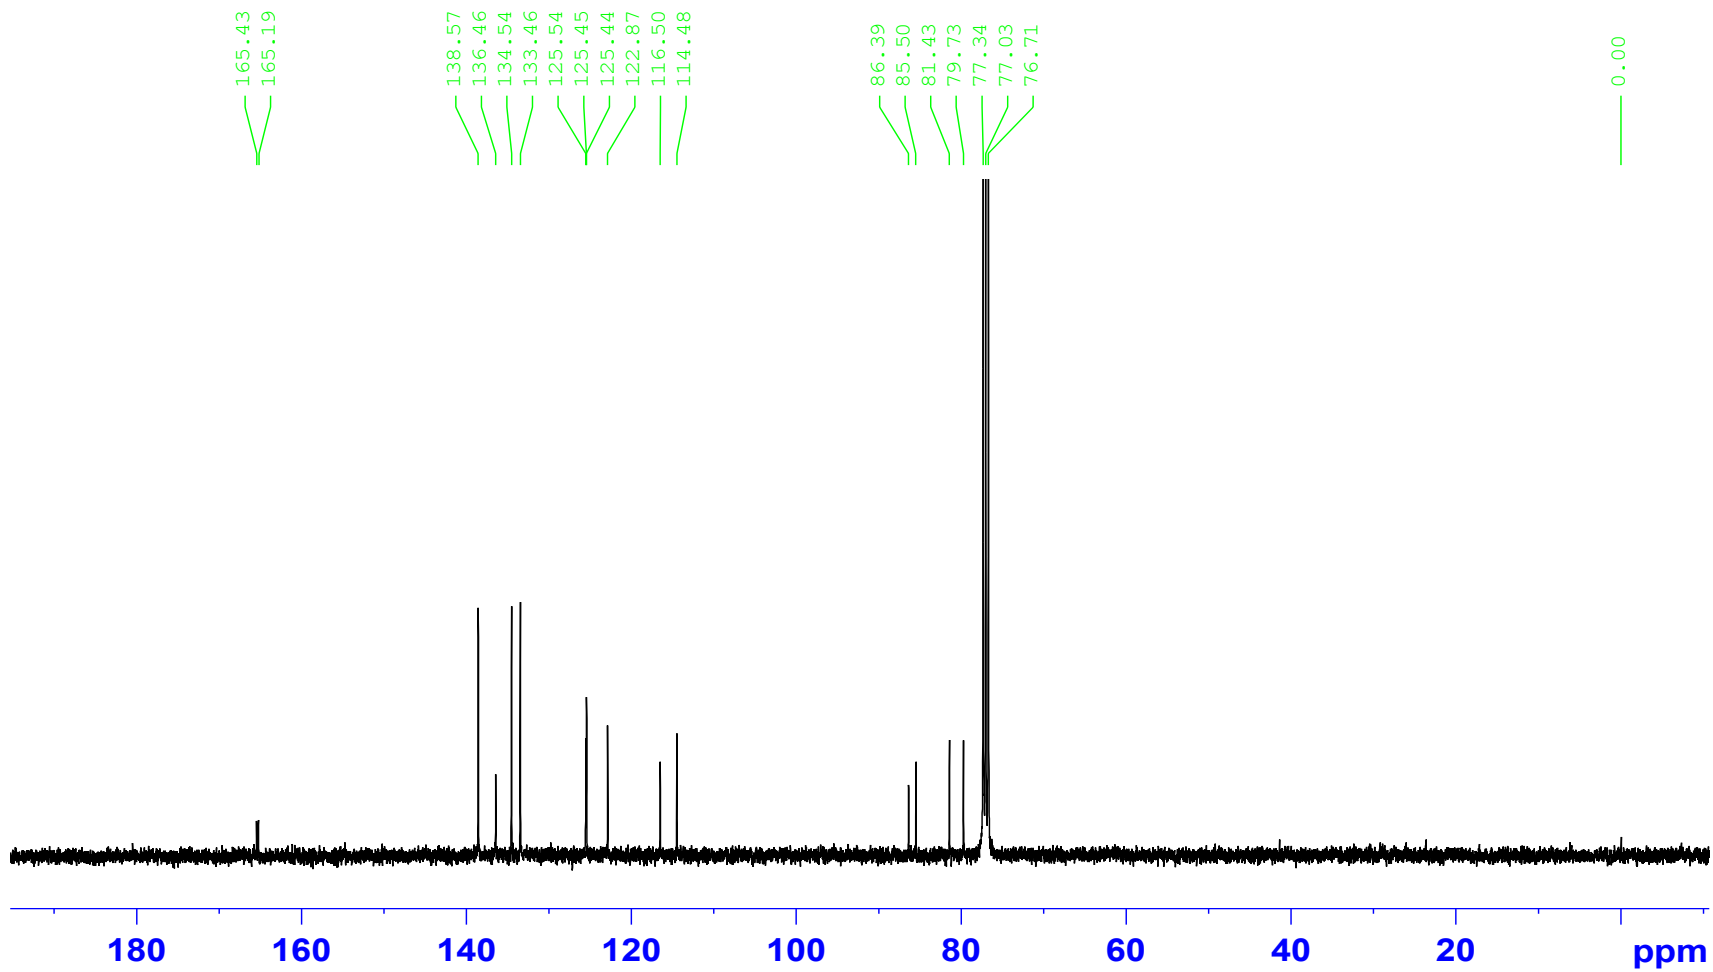

Compound **6a**

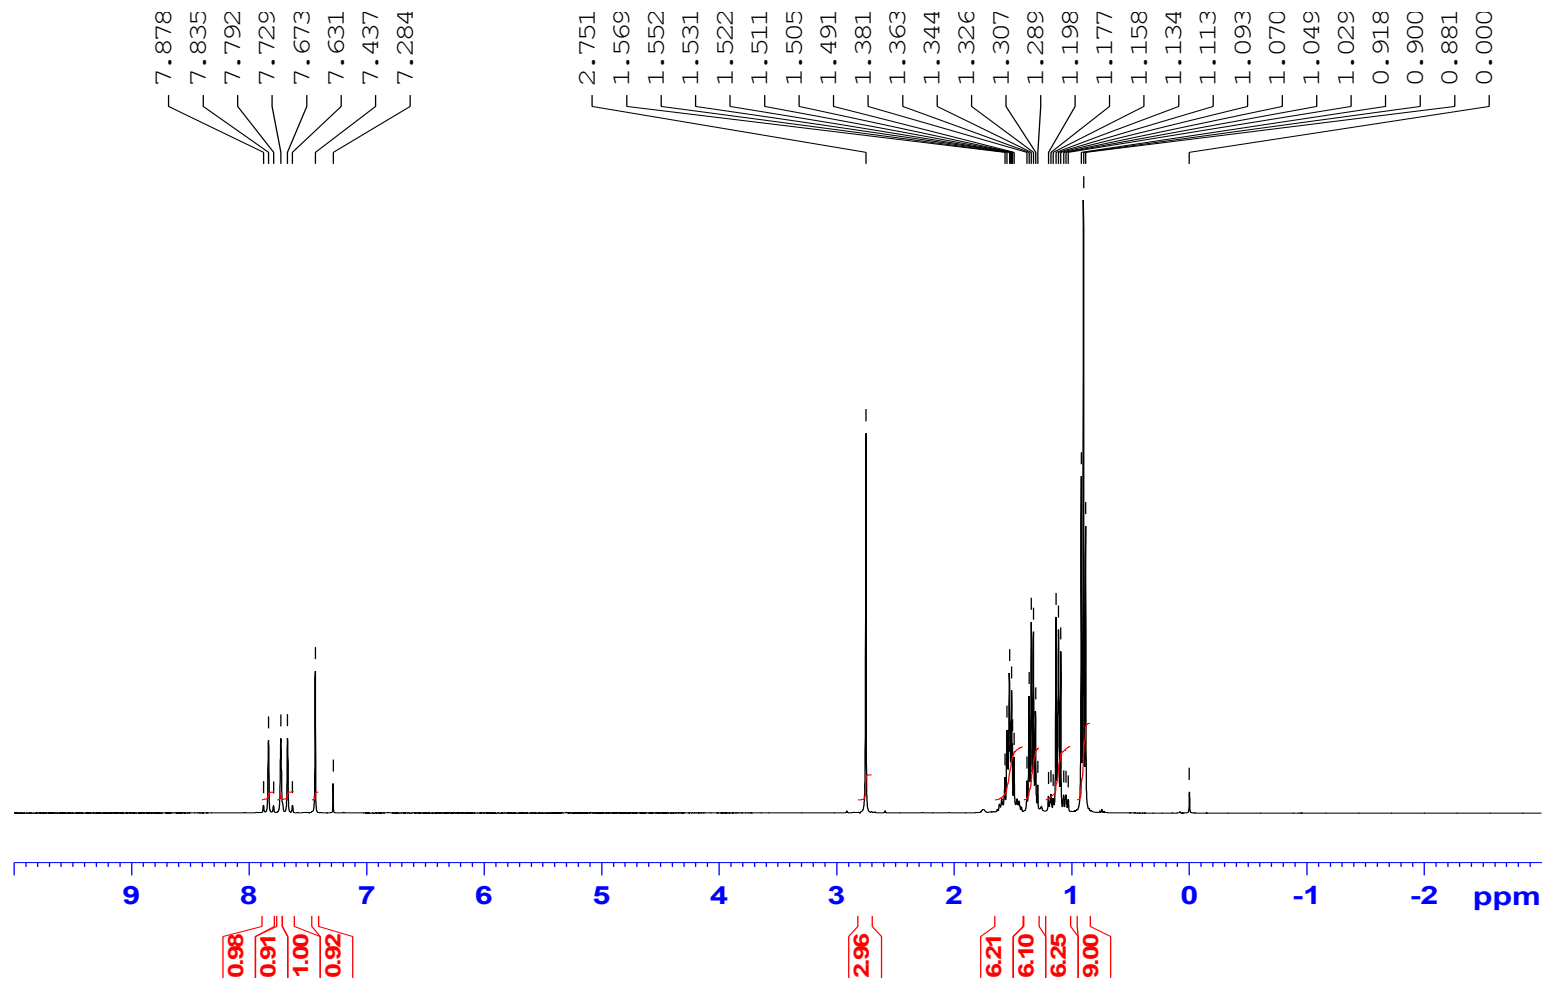

### Compound 6a

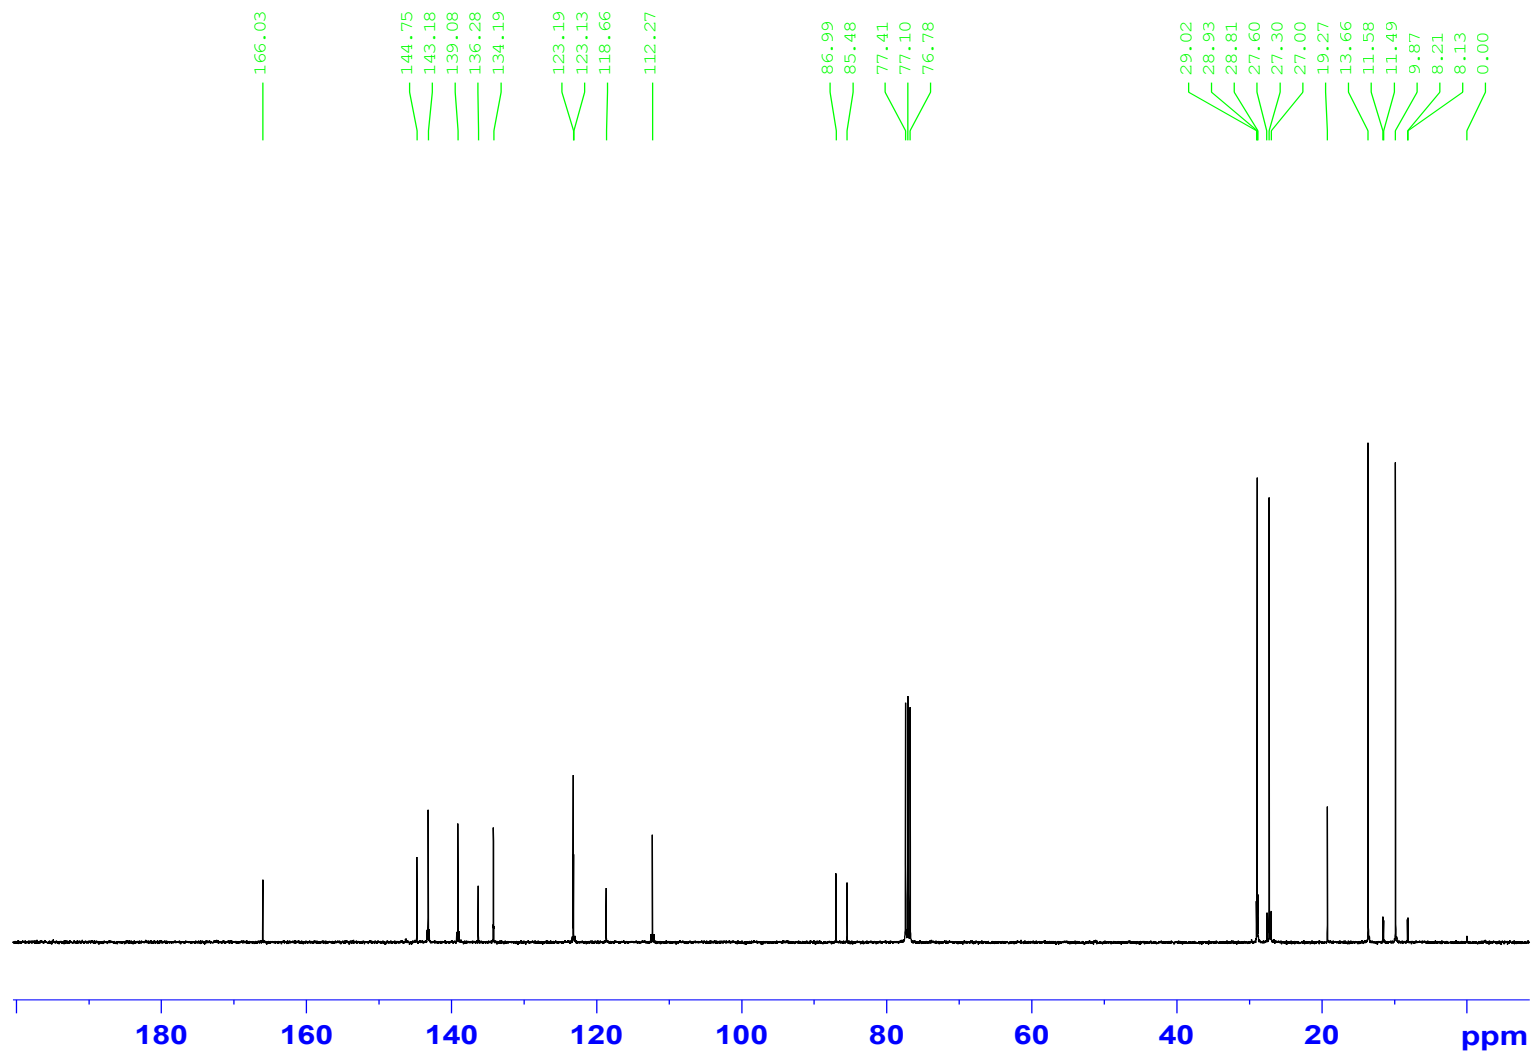



Compound **6b**

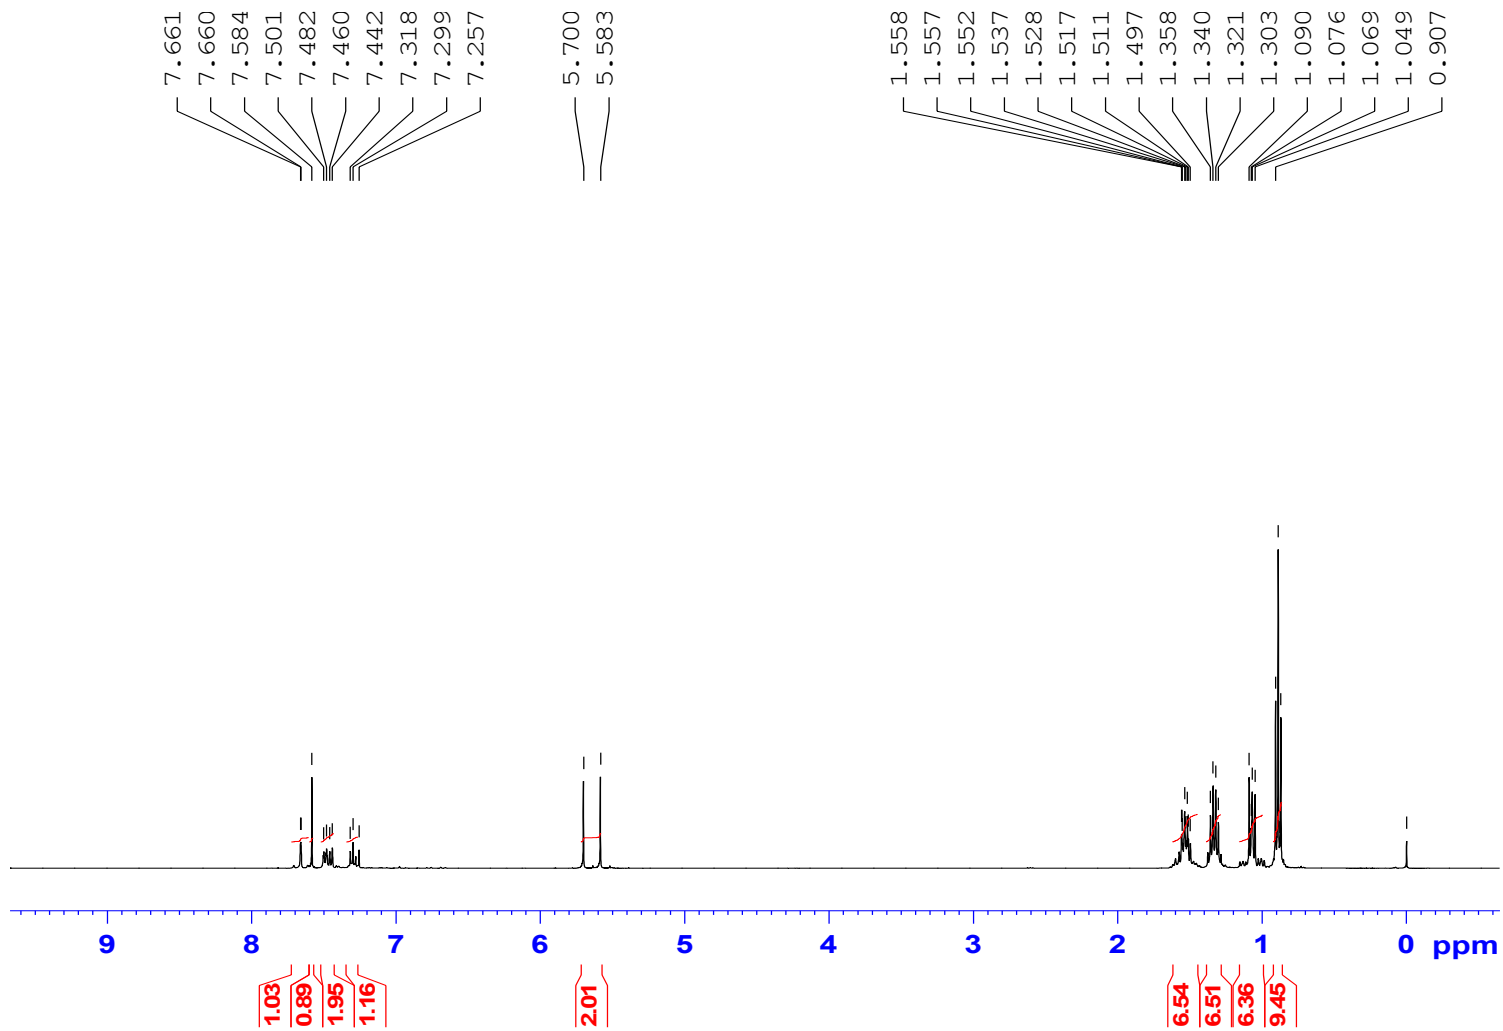

Compound **6b**

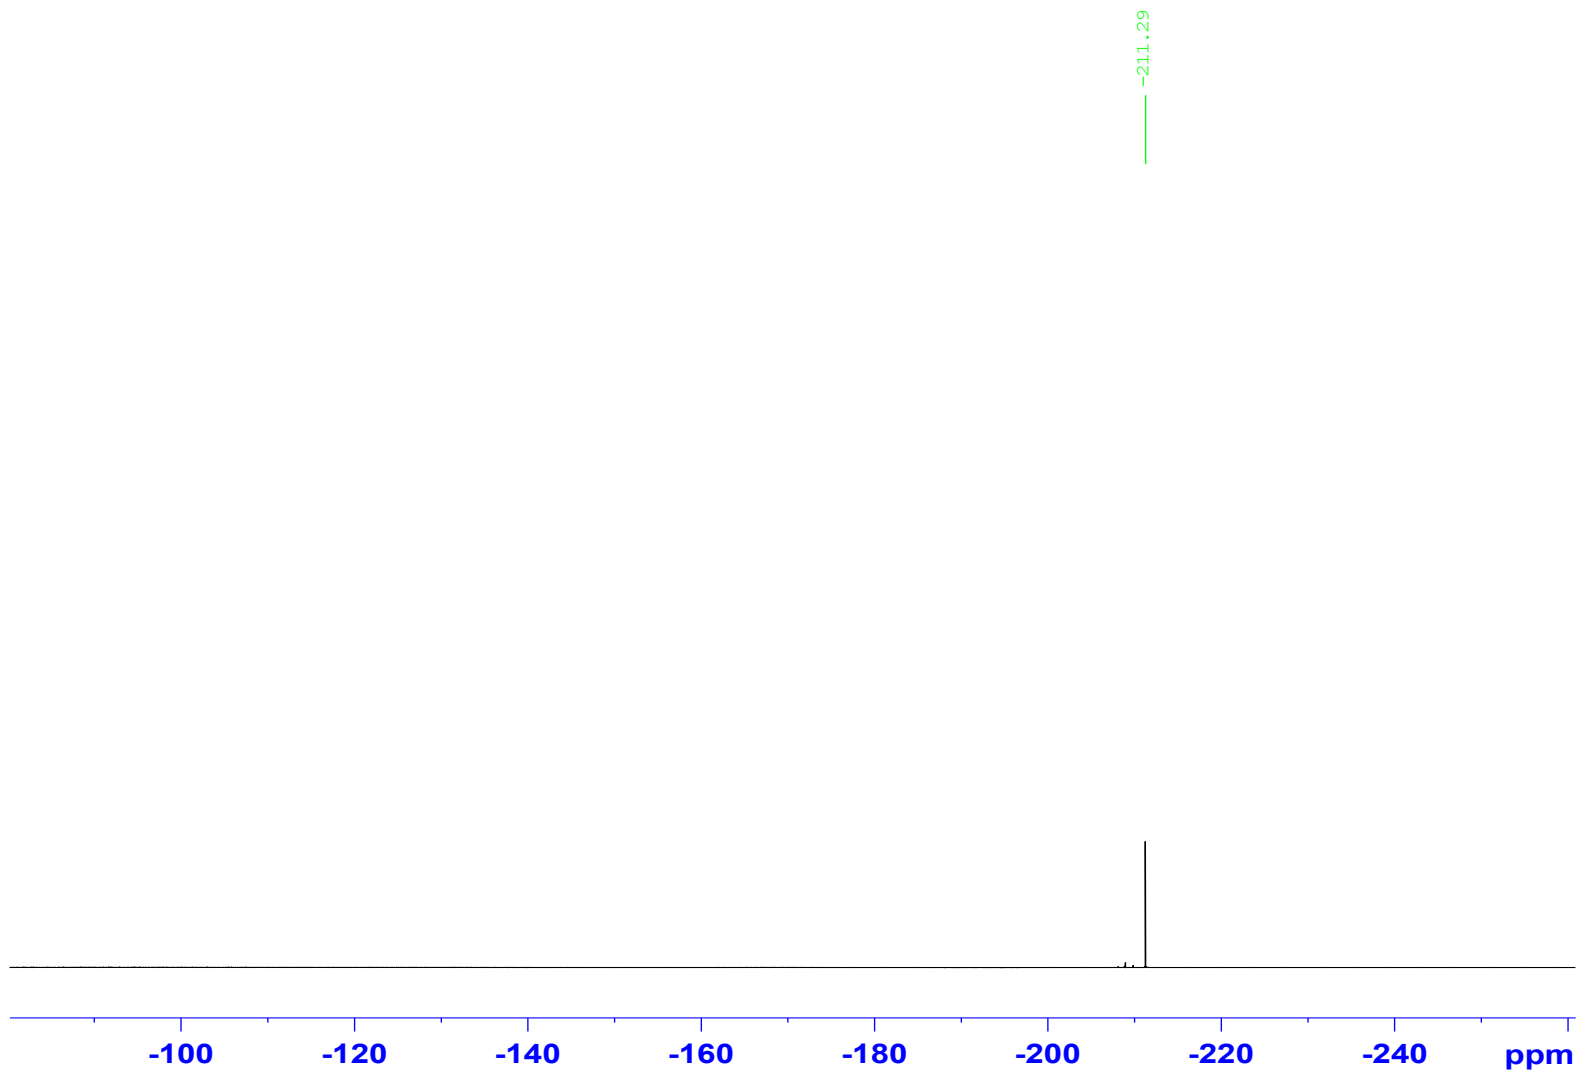

Compound **6b**

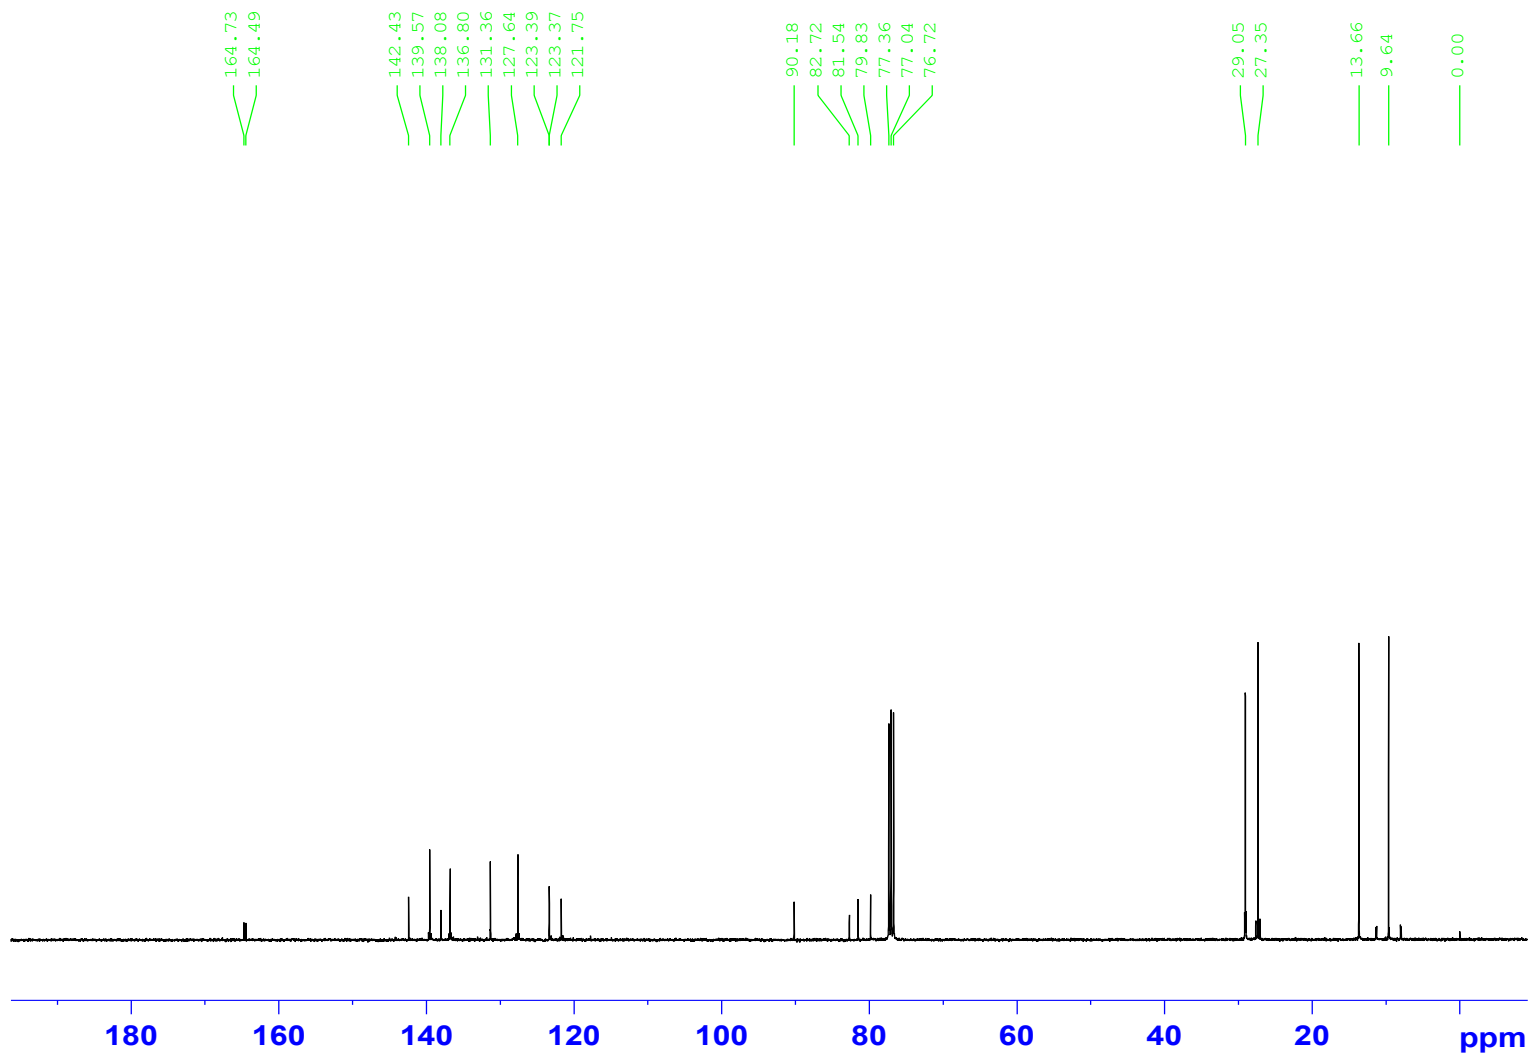

### Compound **6c**

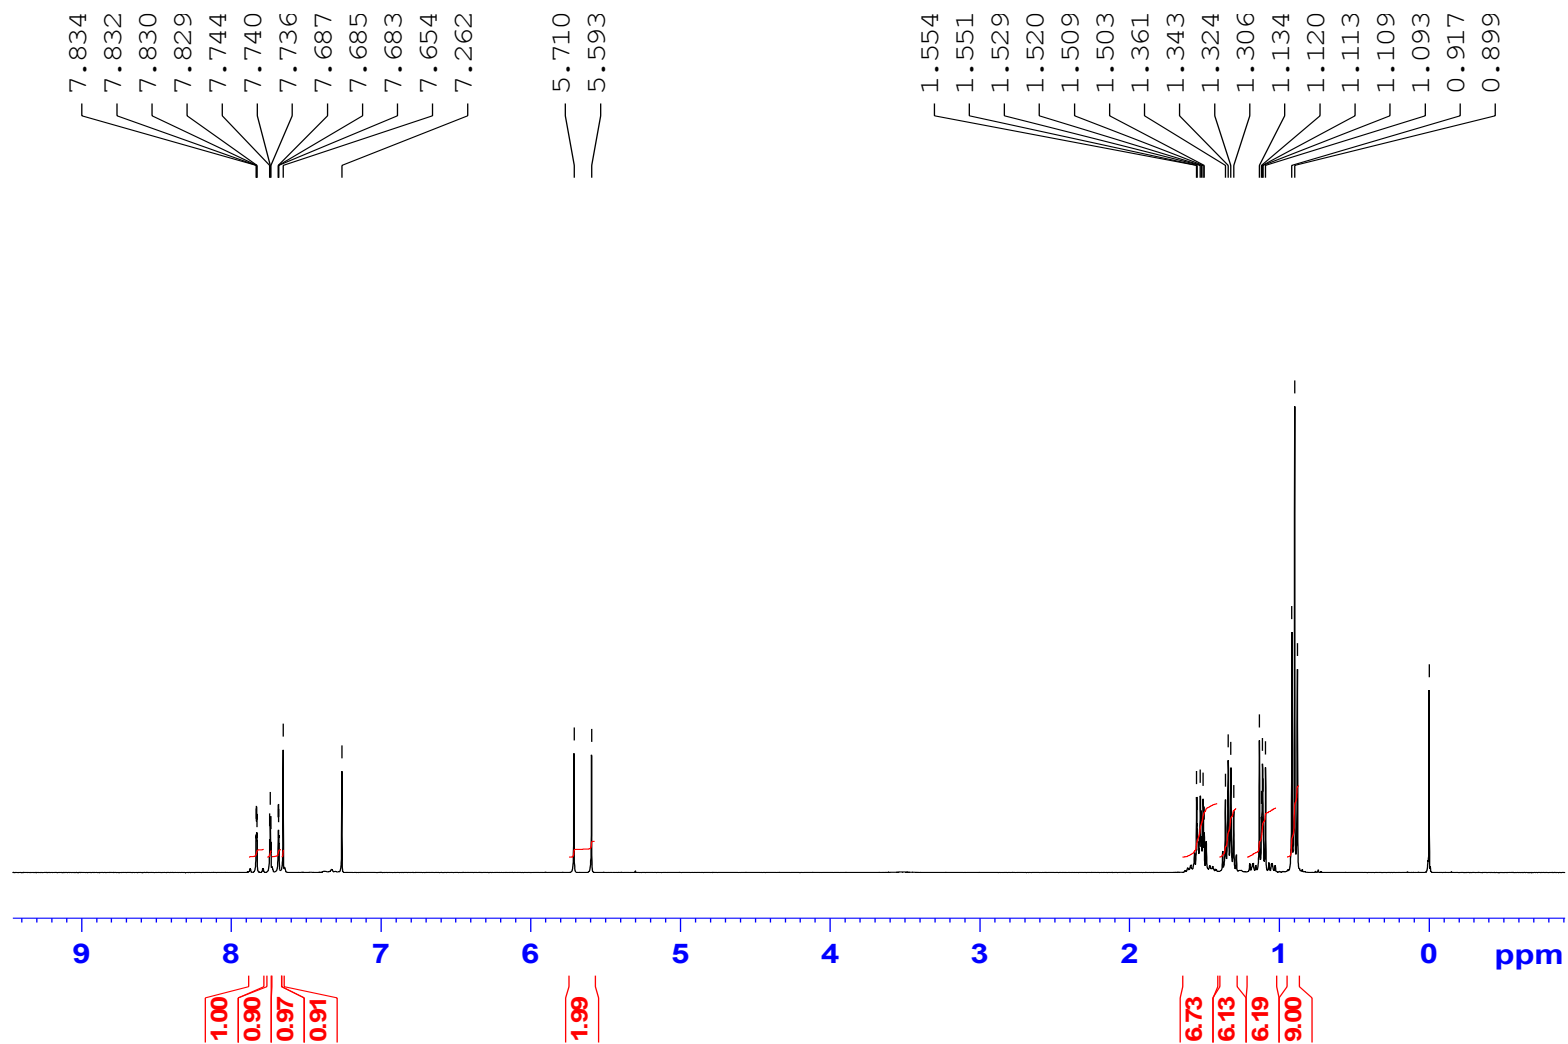

Compound **6c**

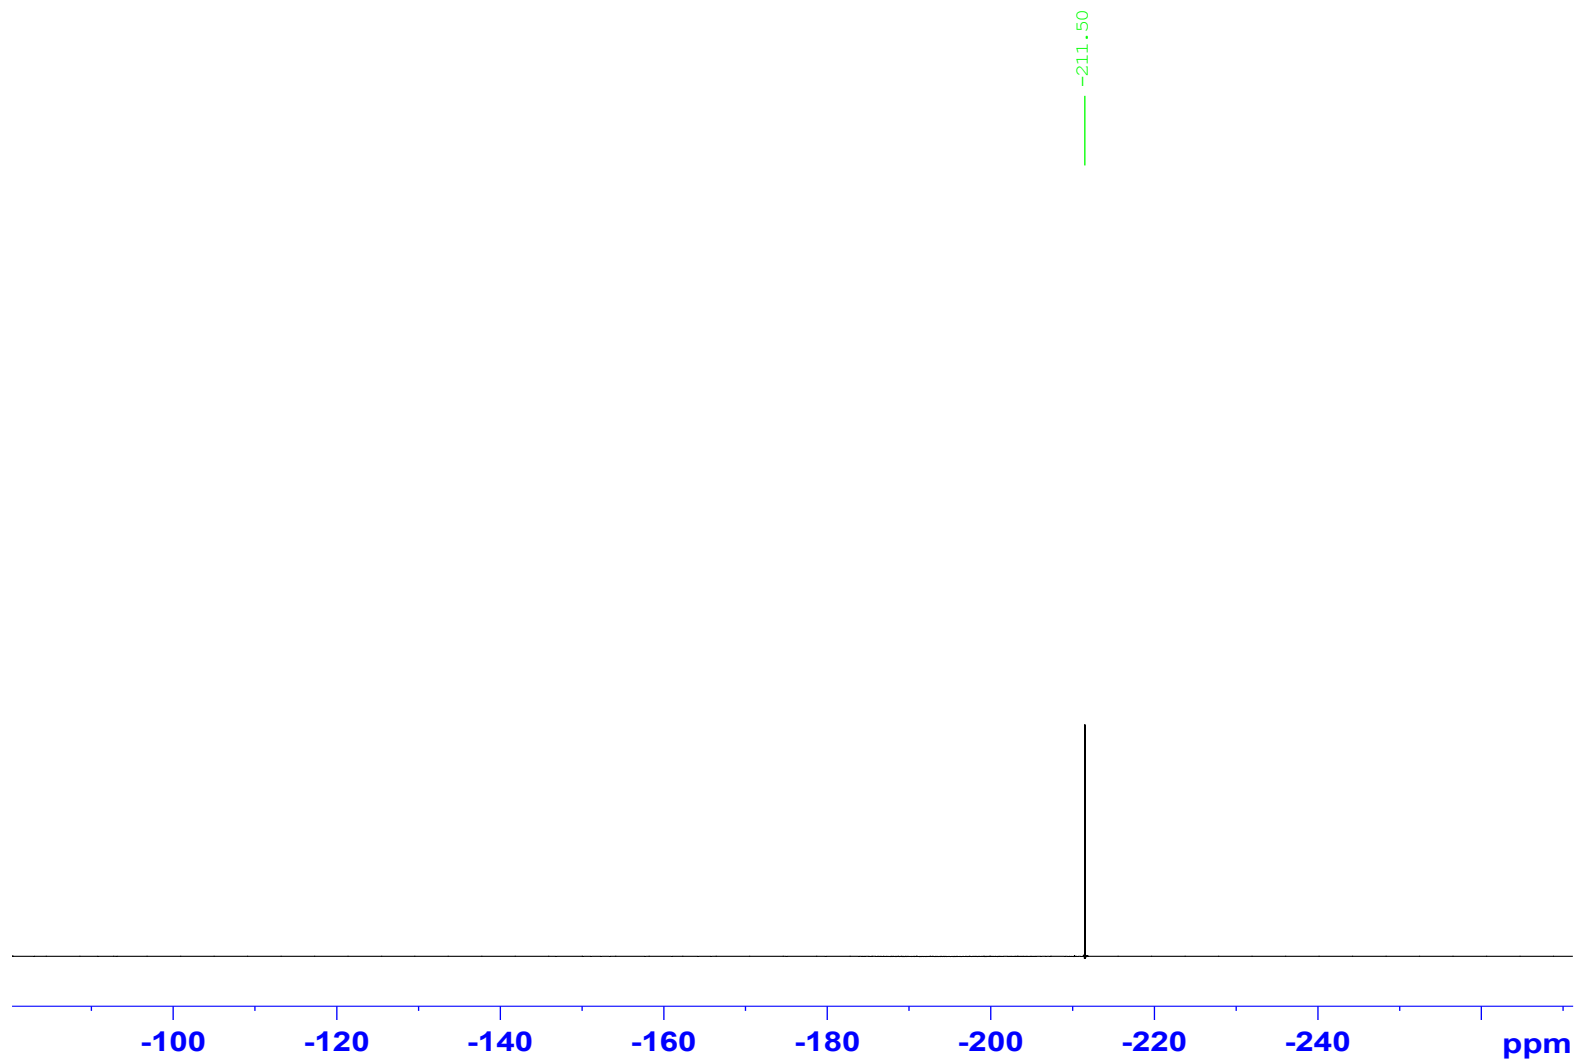

Compound **6c**

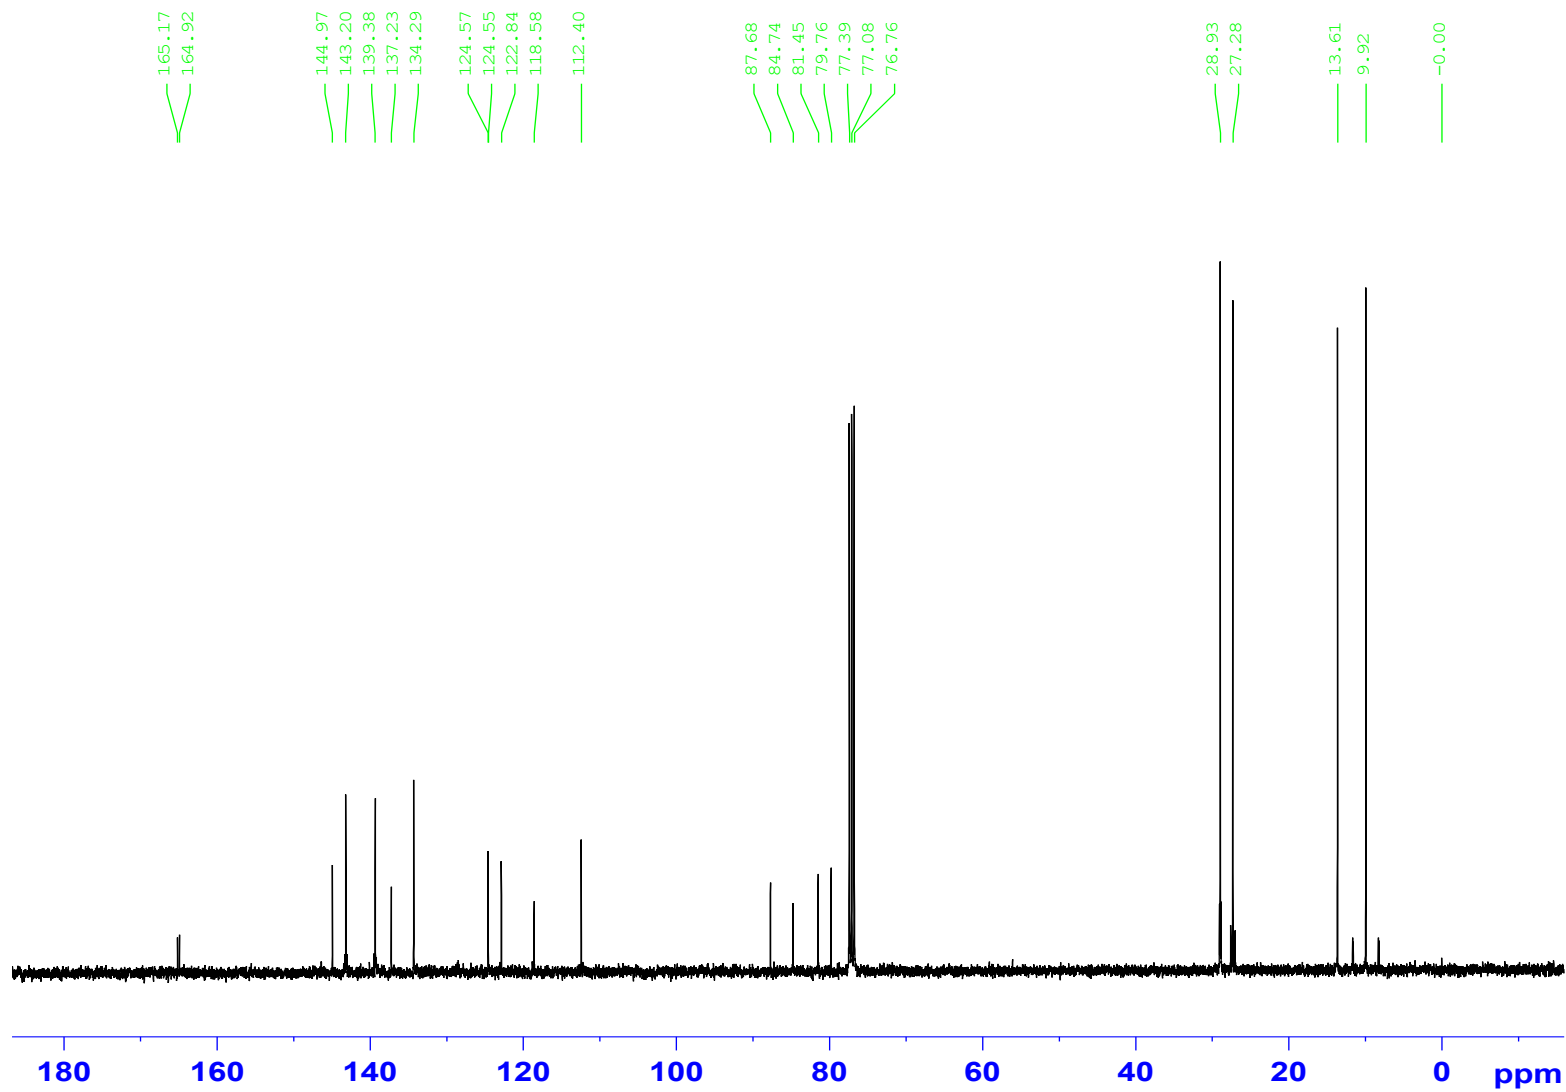

Compound **7a**

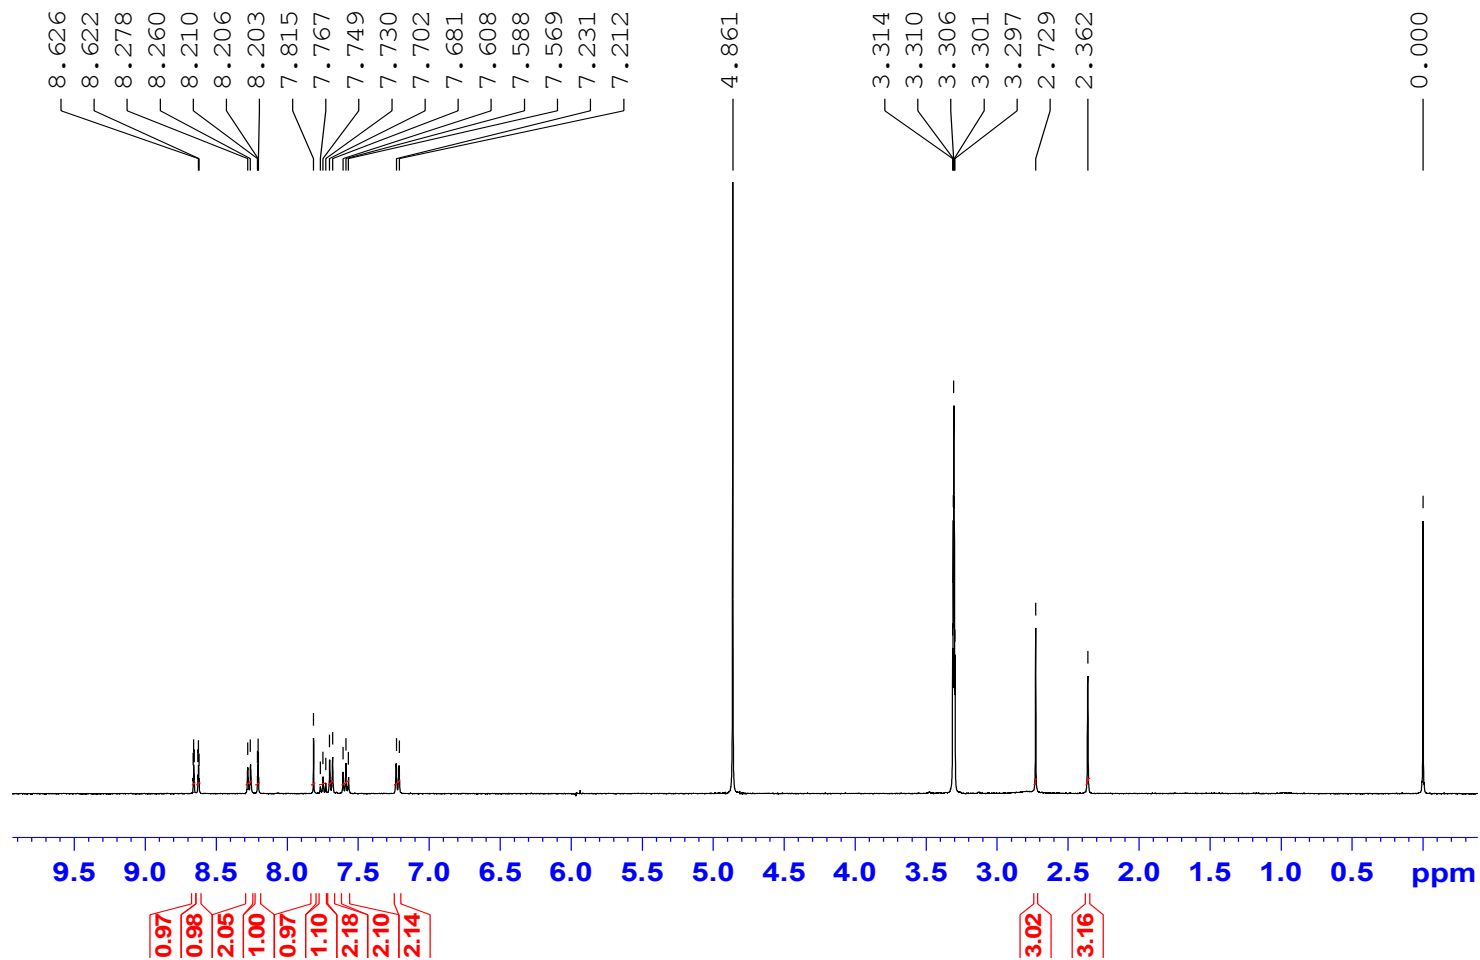

Compound **7a**

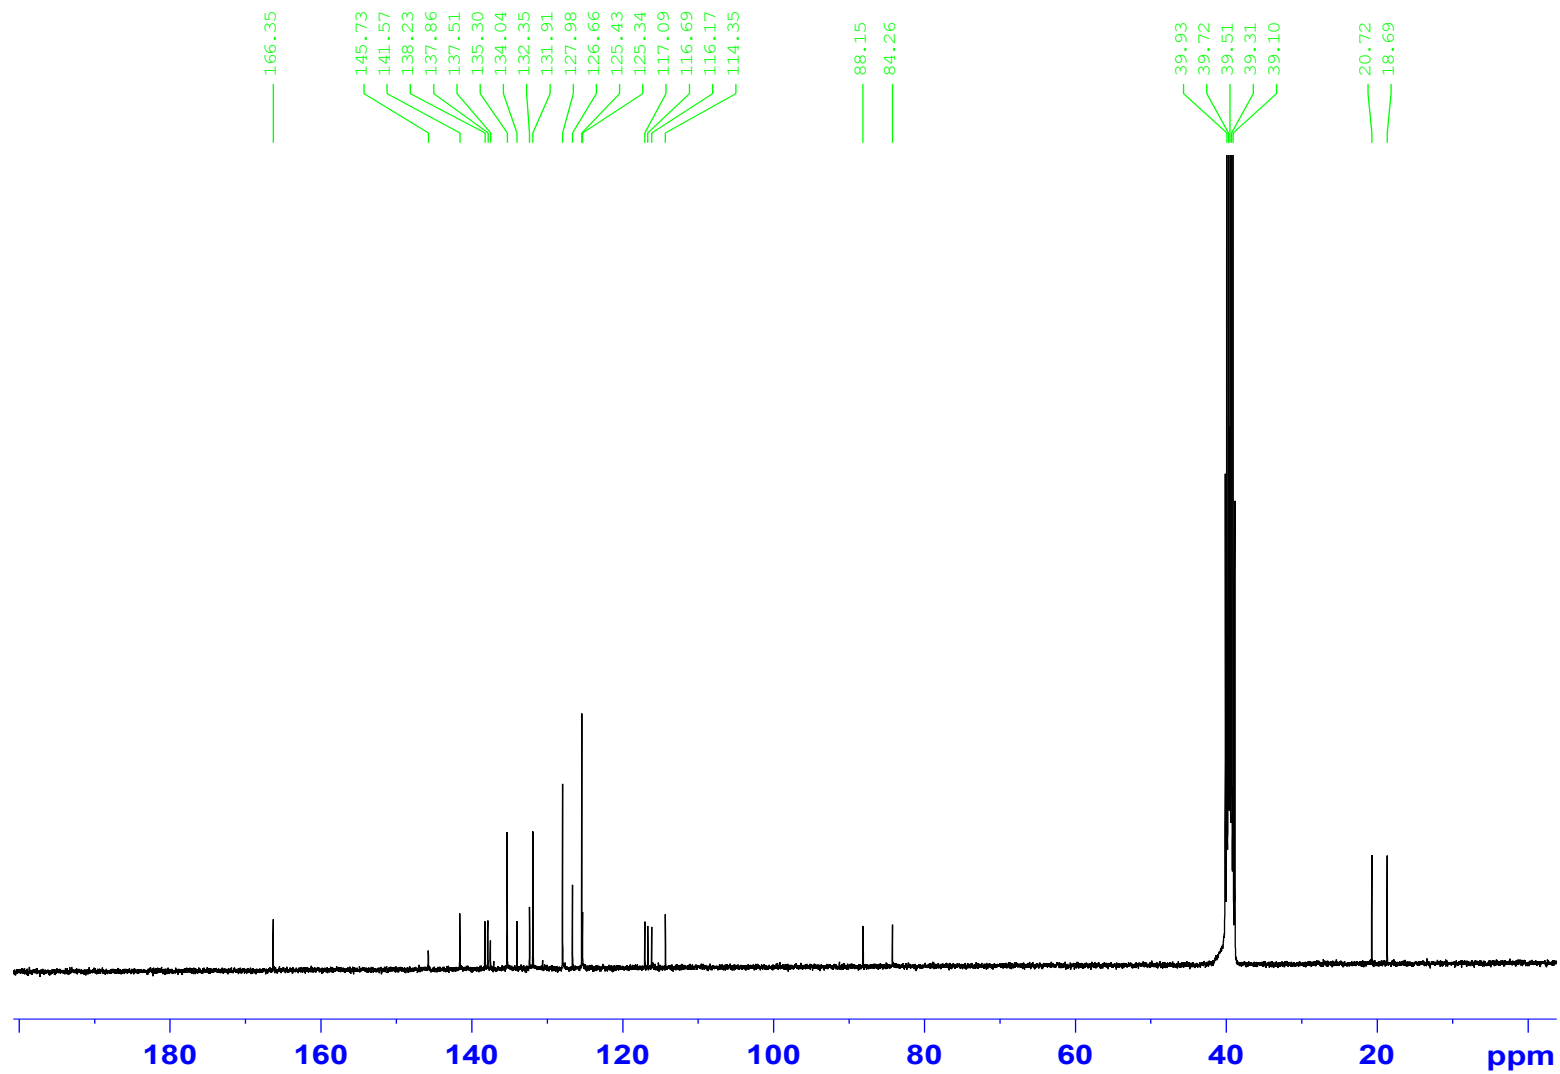



Compound **7b**

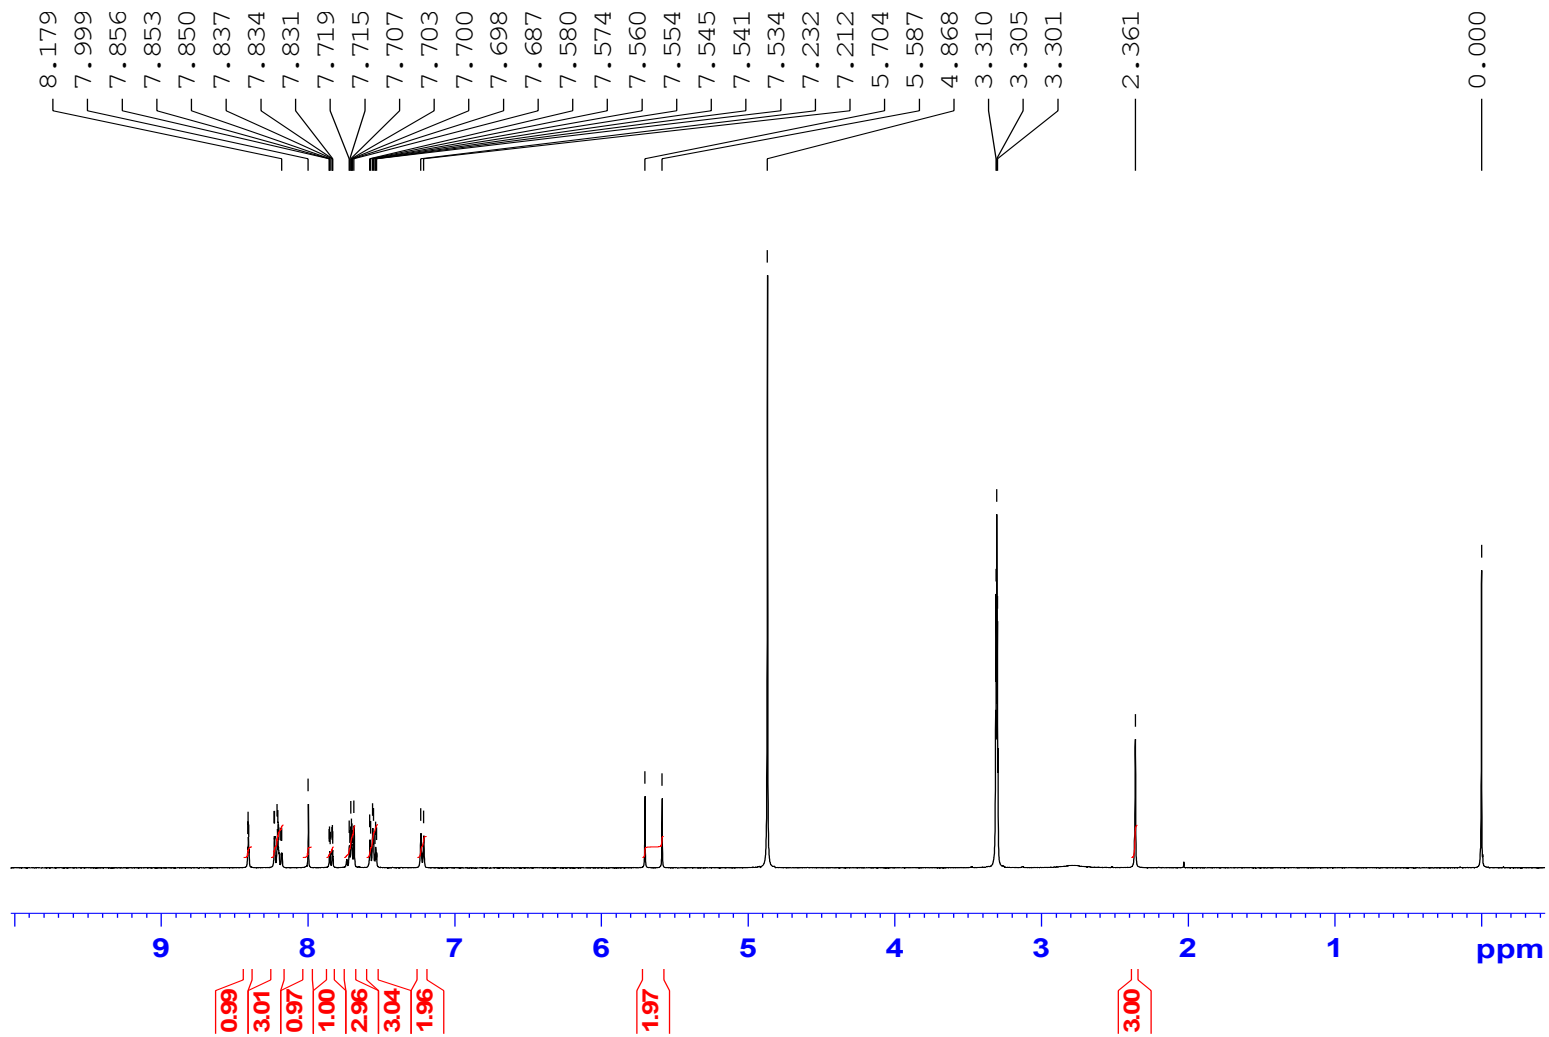

Compound **7b**

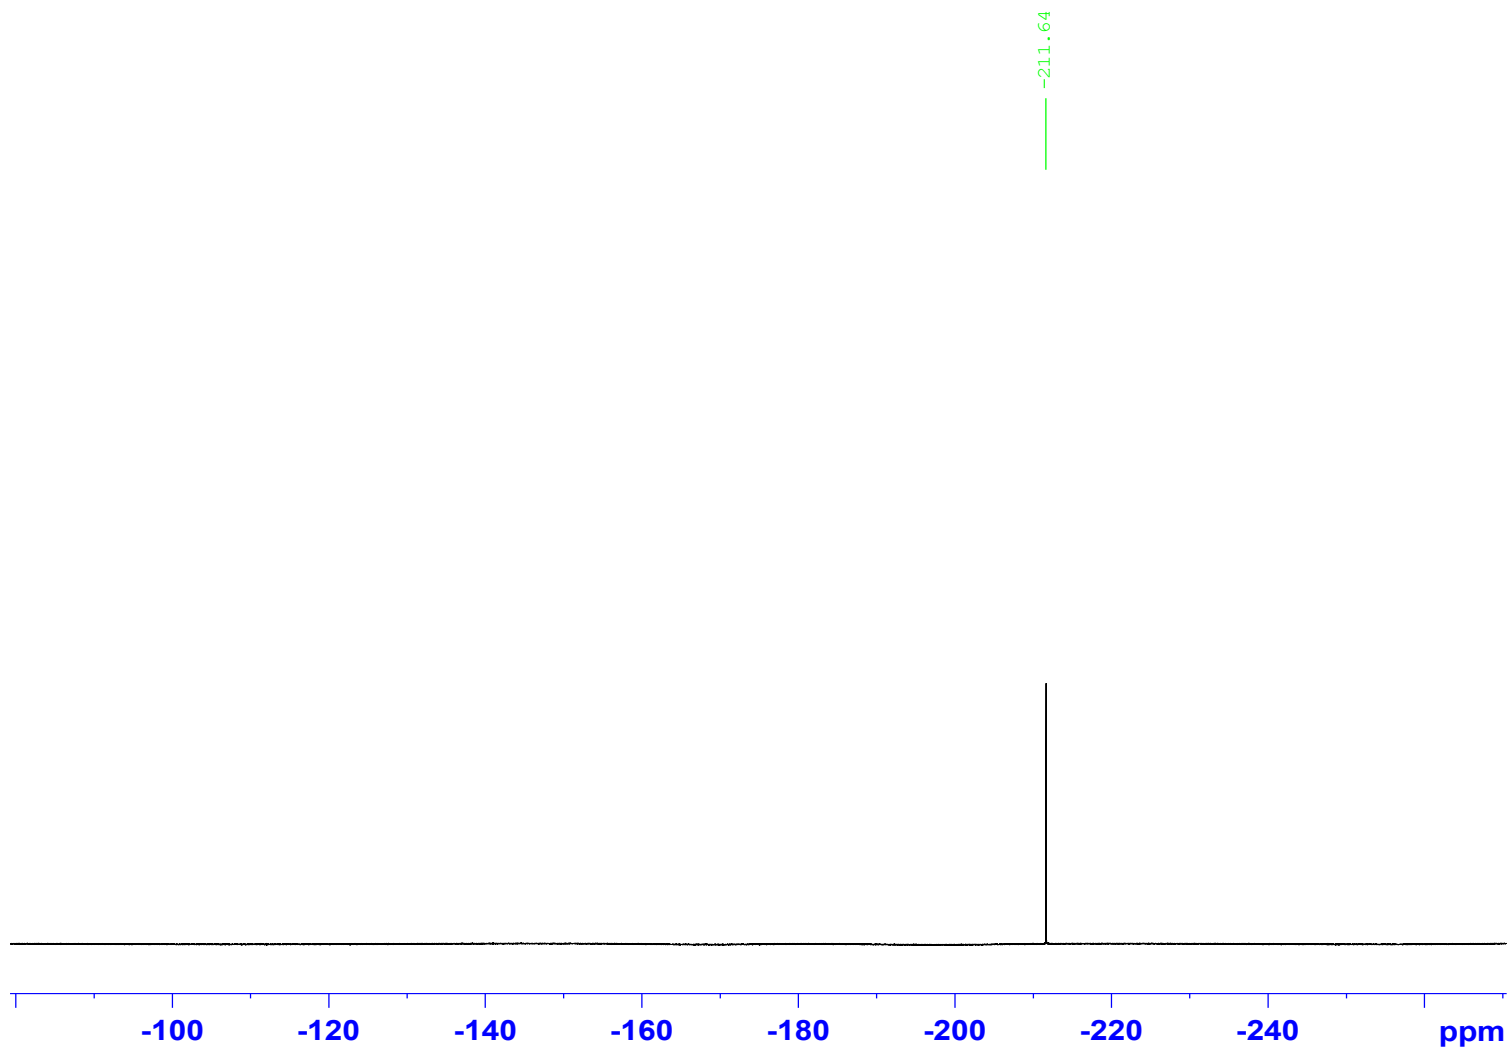

Compound **7b**

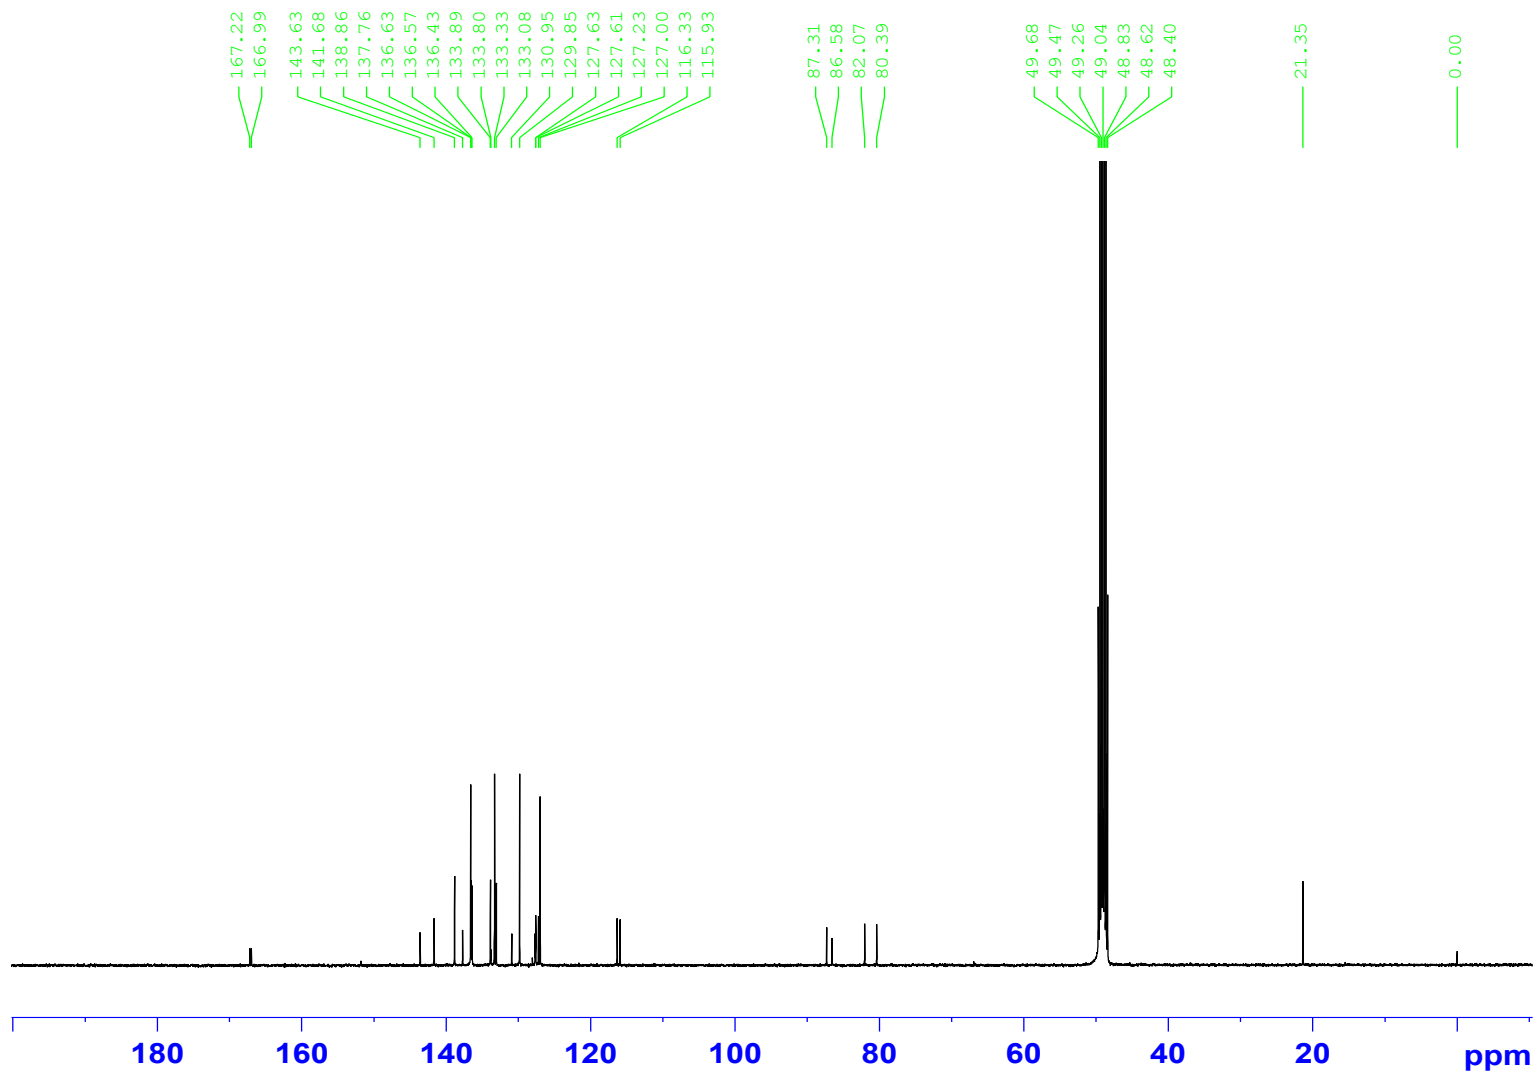

Compound **7c**

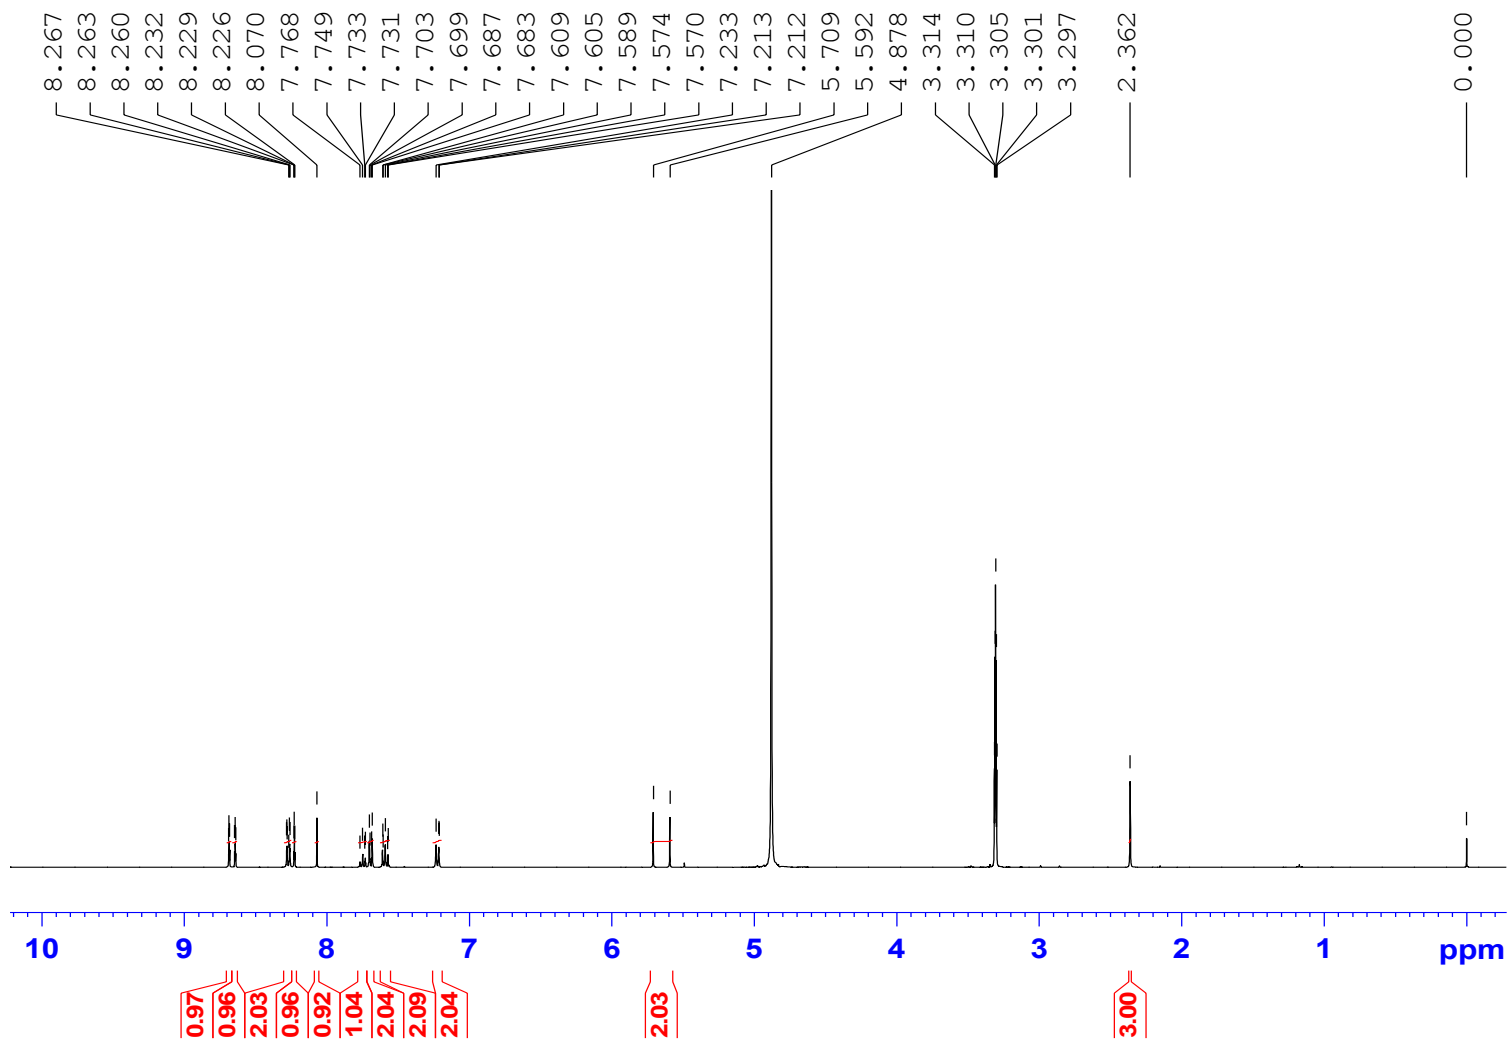

Compound **7c**

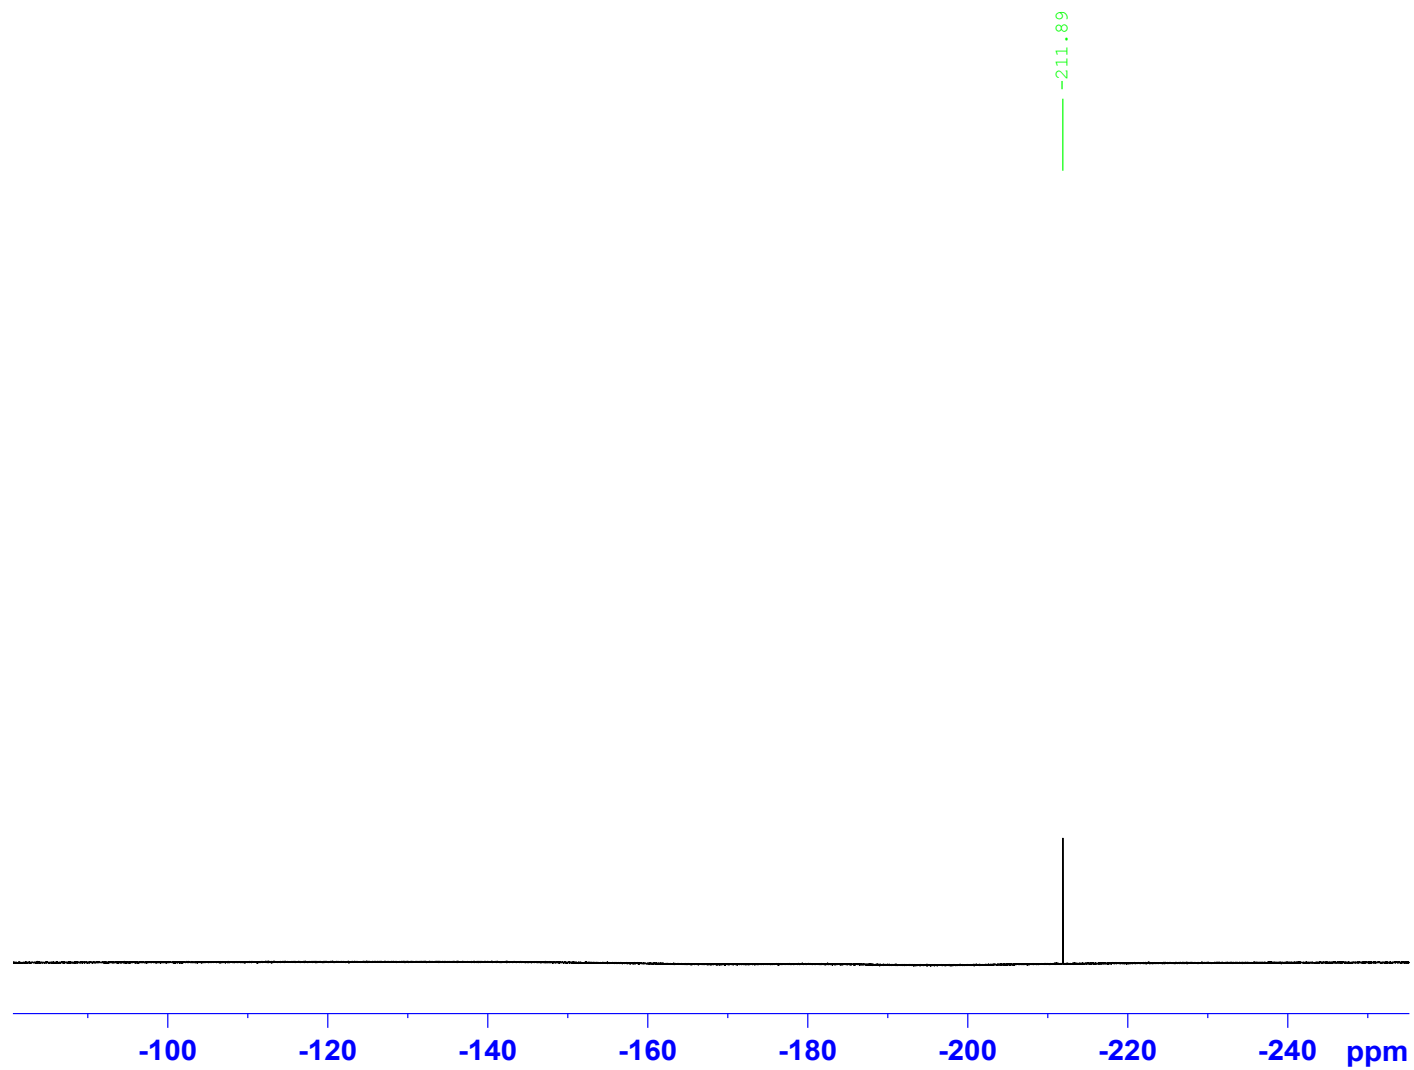

Compound 7c

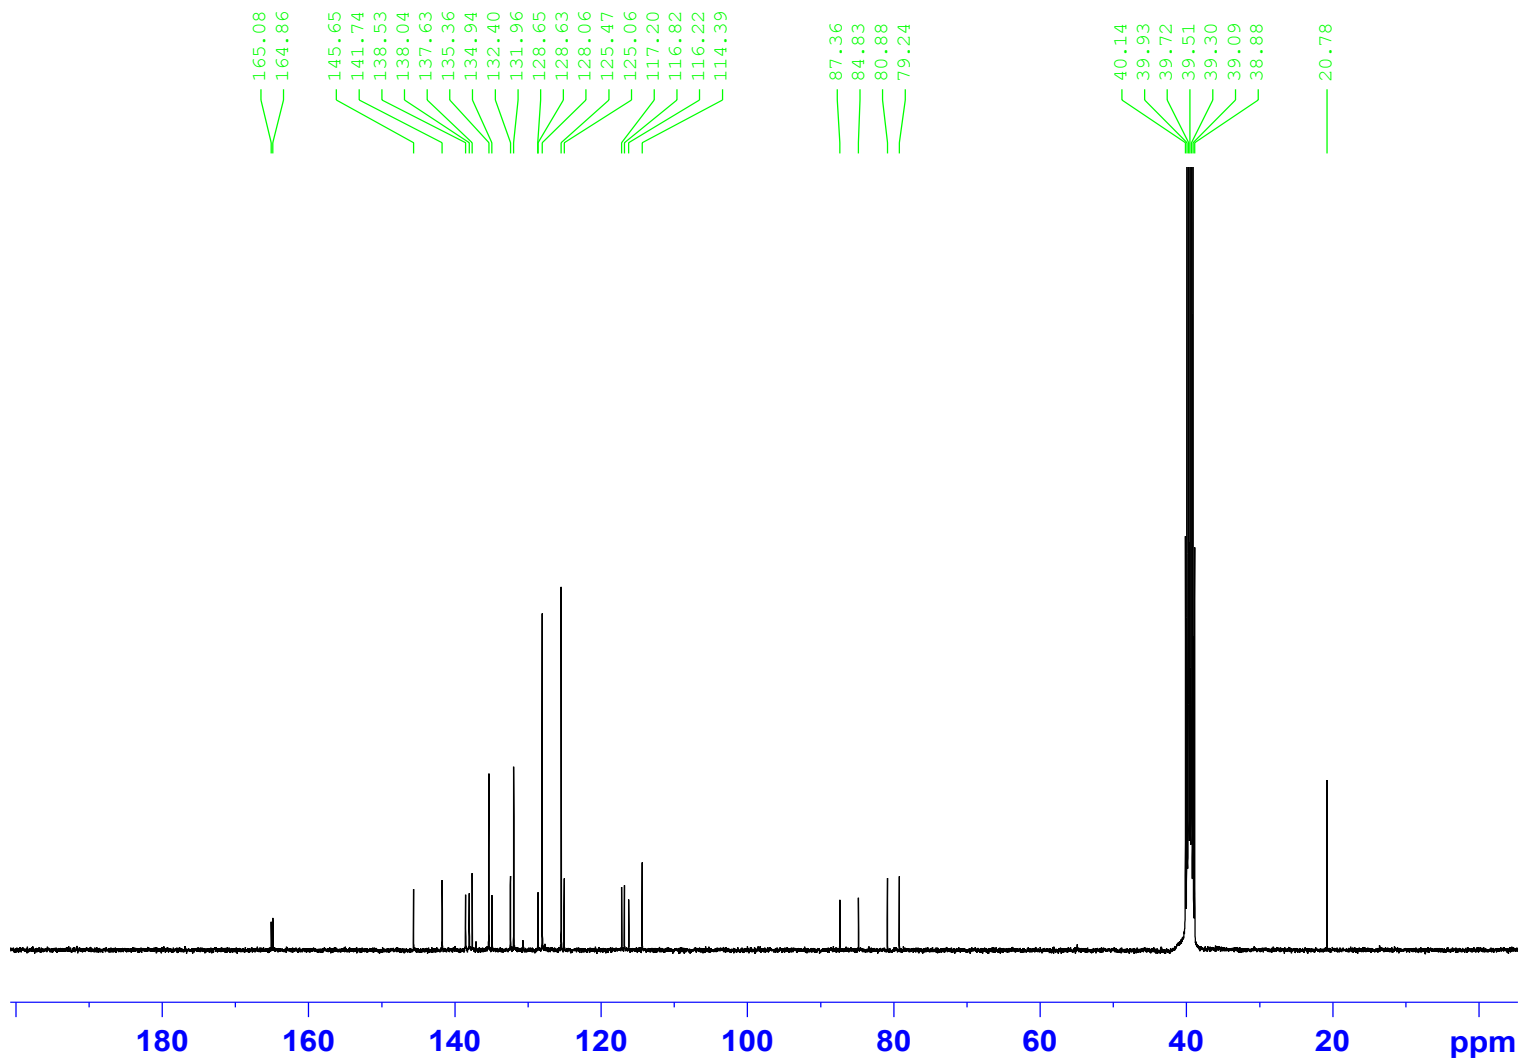

### Compound 8a

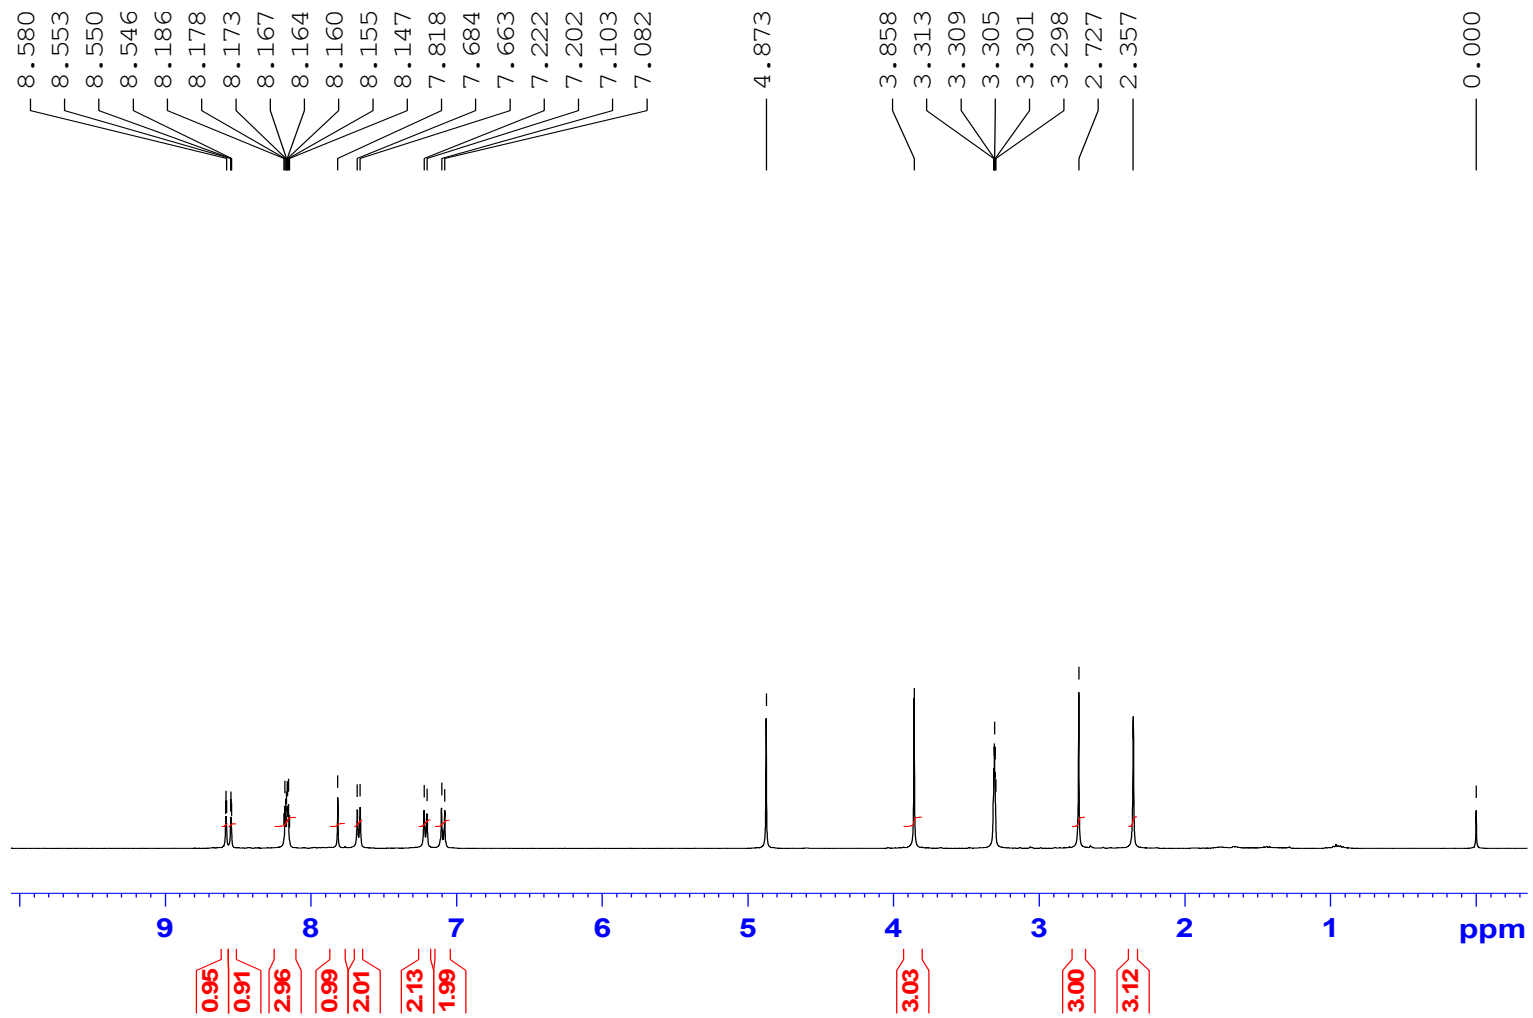

### Compound 8a

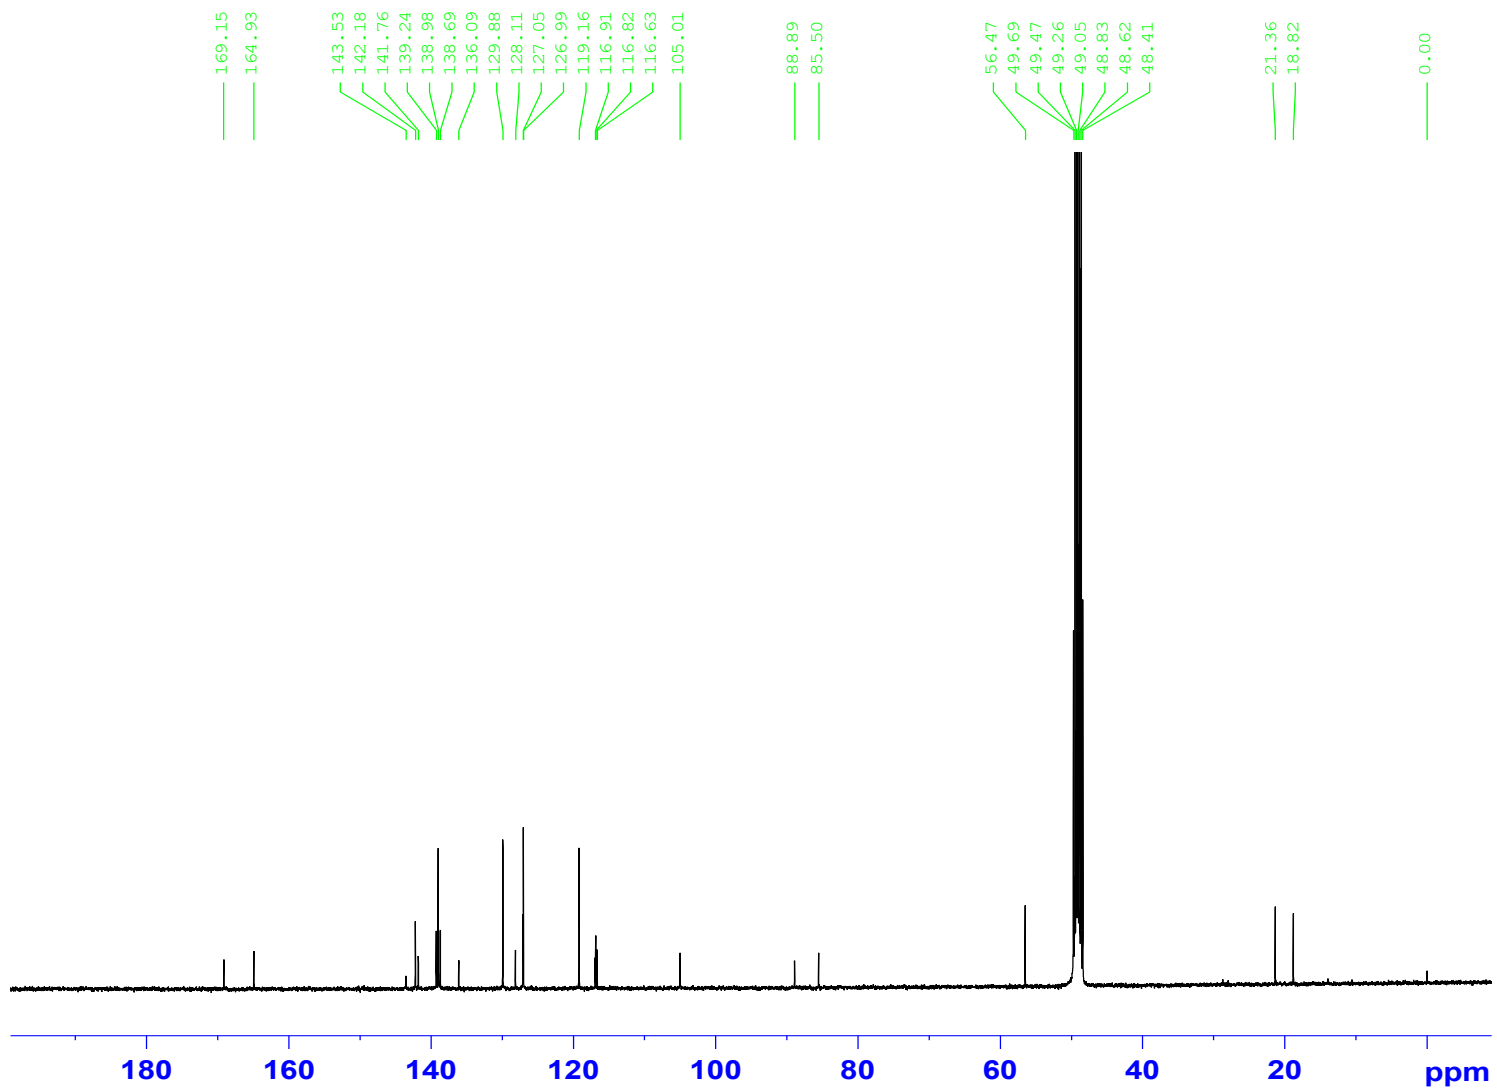



Compound **8b**

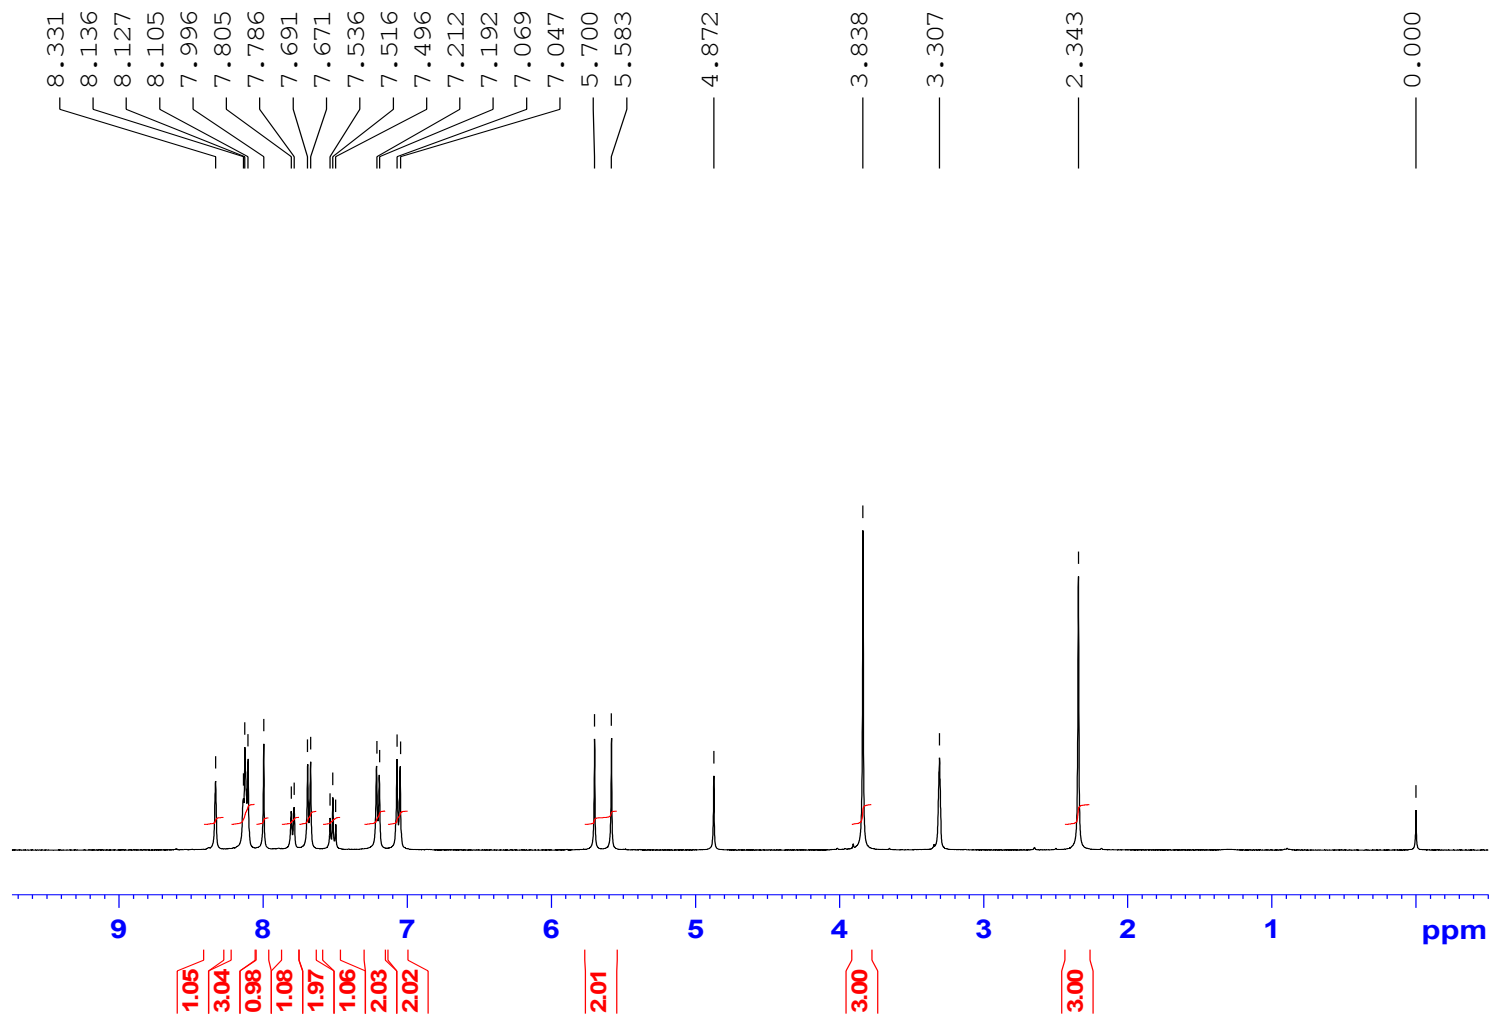

Compound **8b**

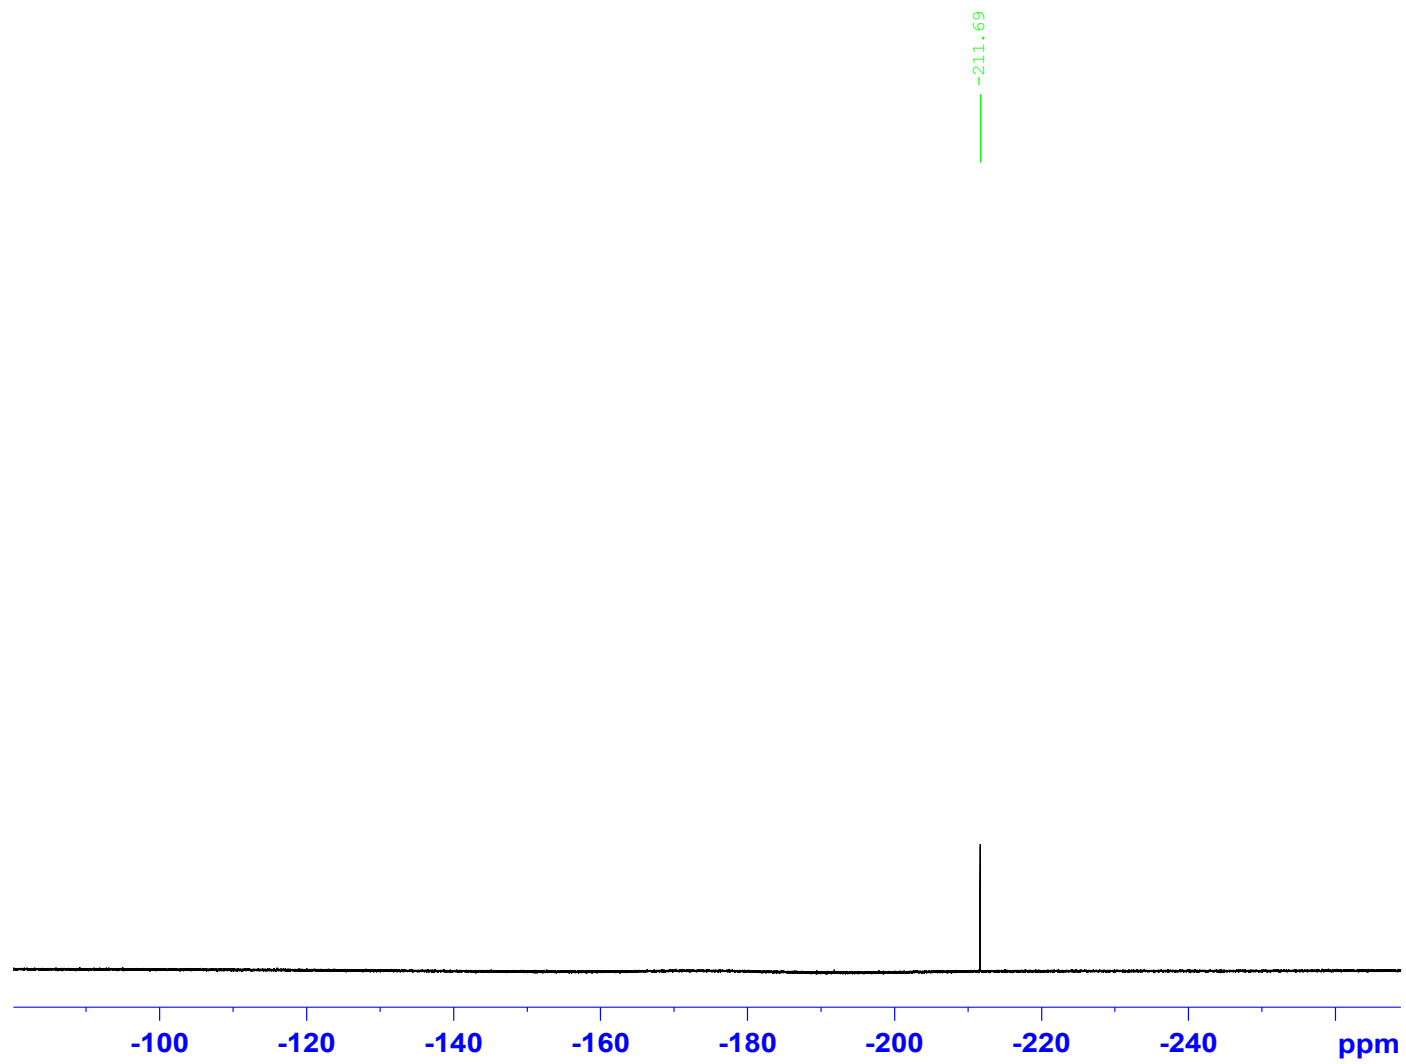

Compound **8b**

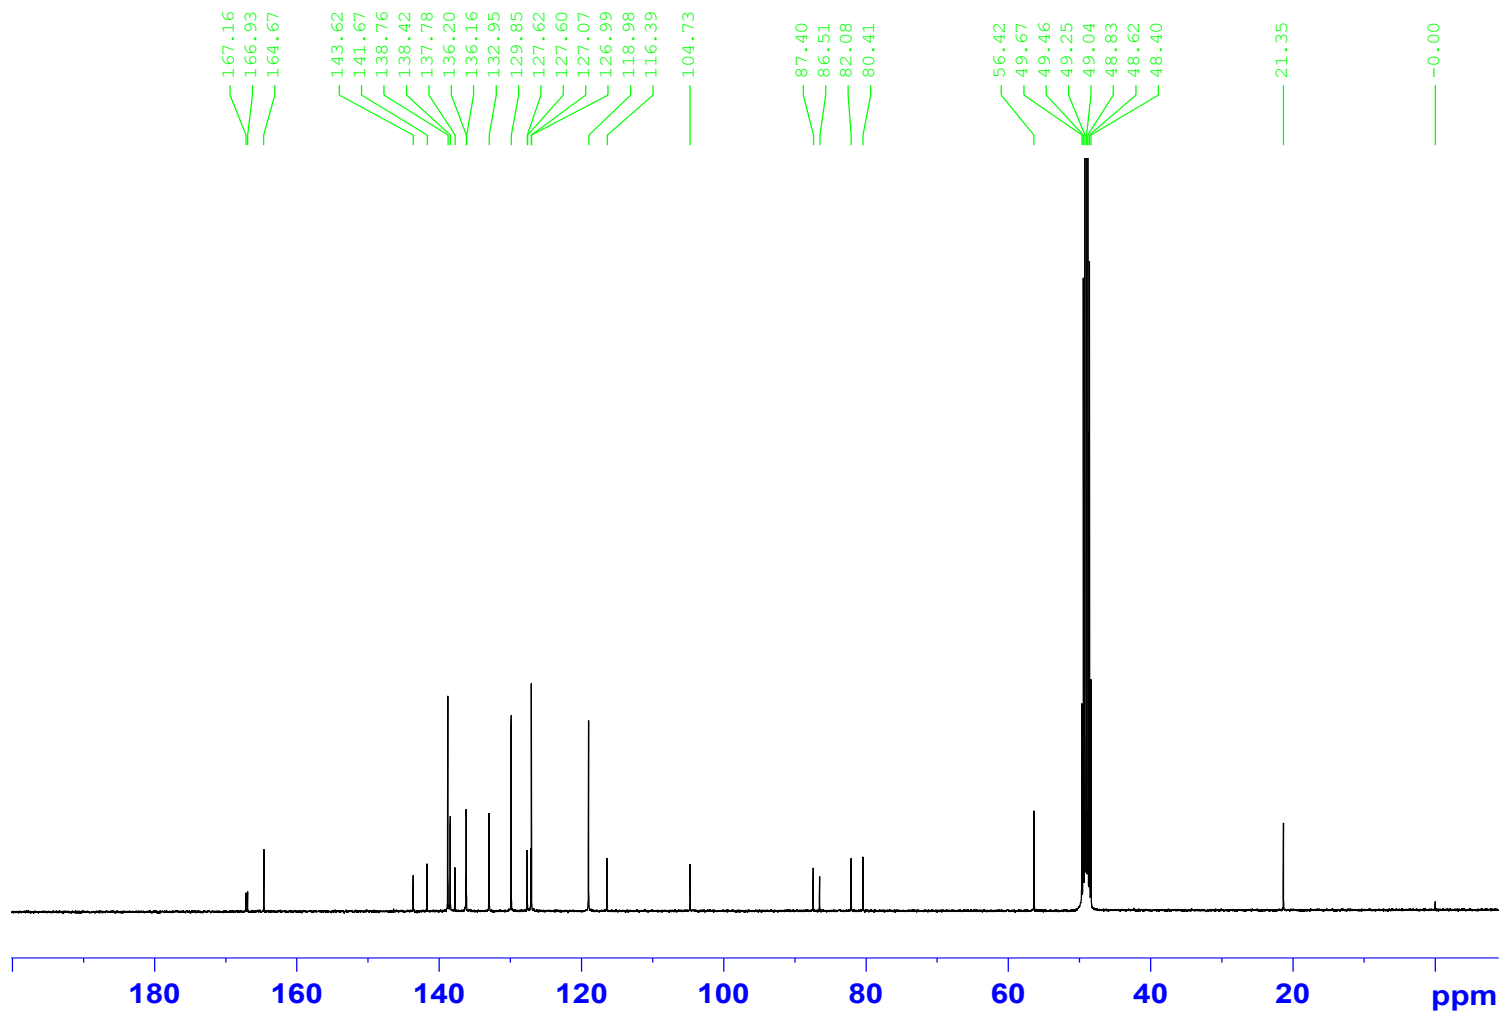

Compound **8c**

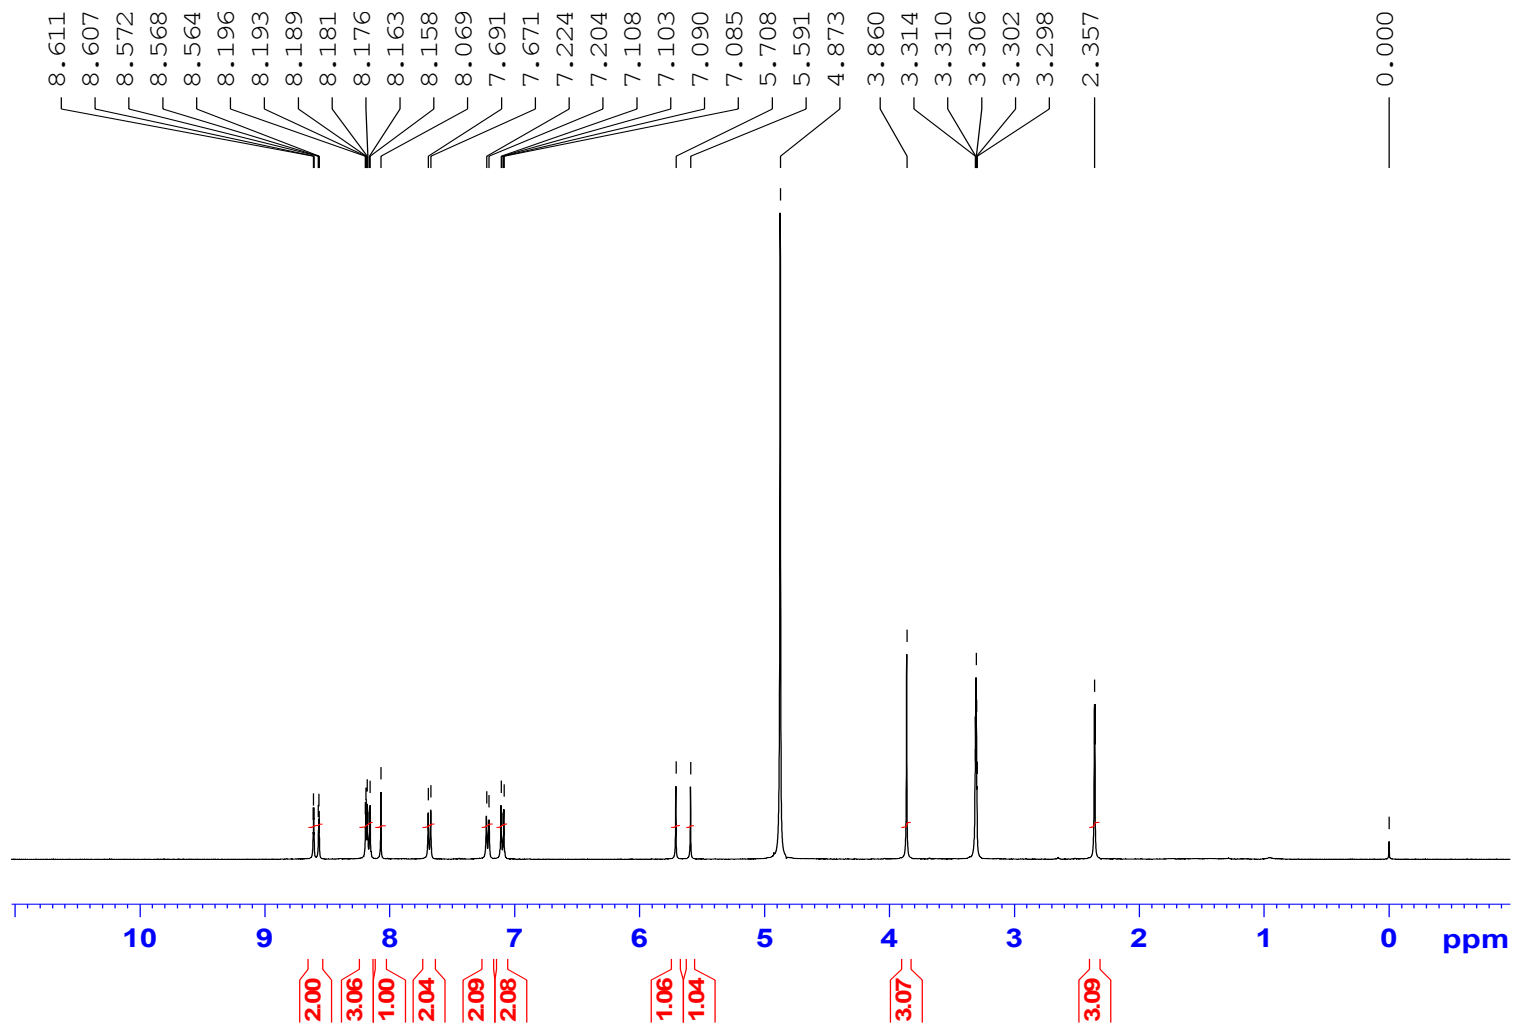

Compound **8c**

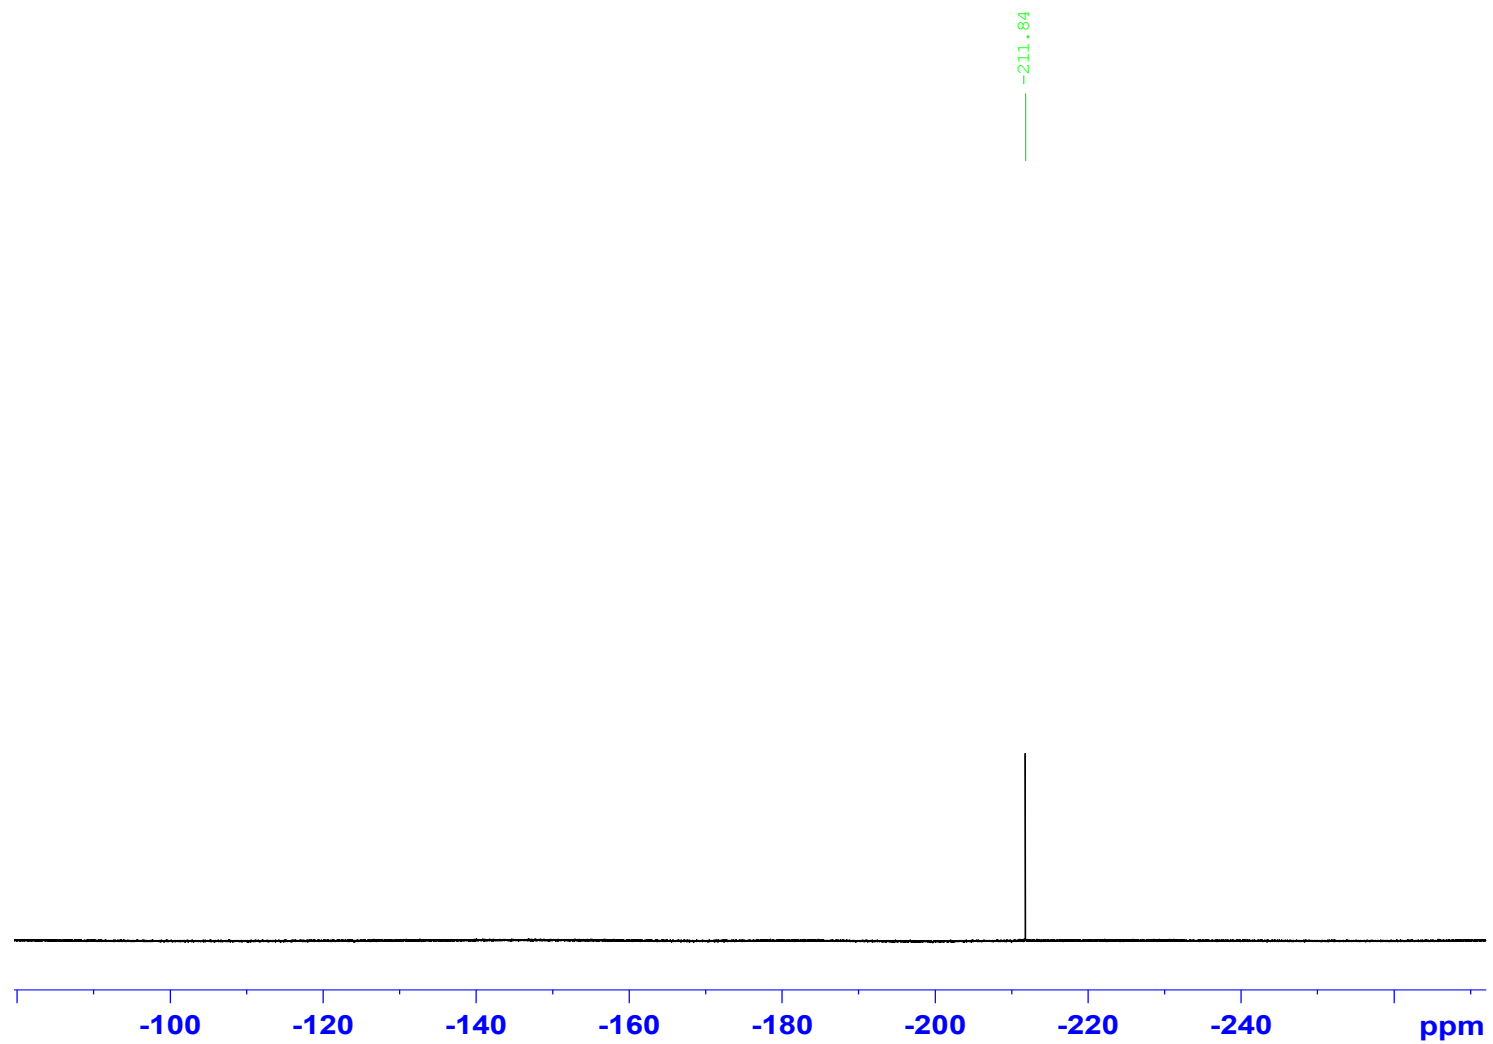

Compound **8c**

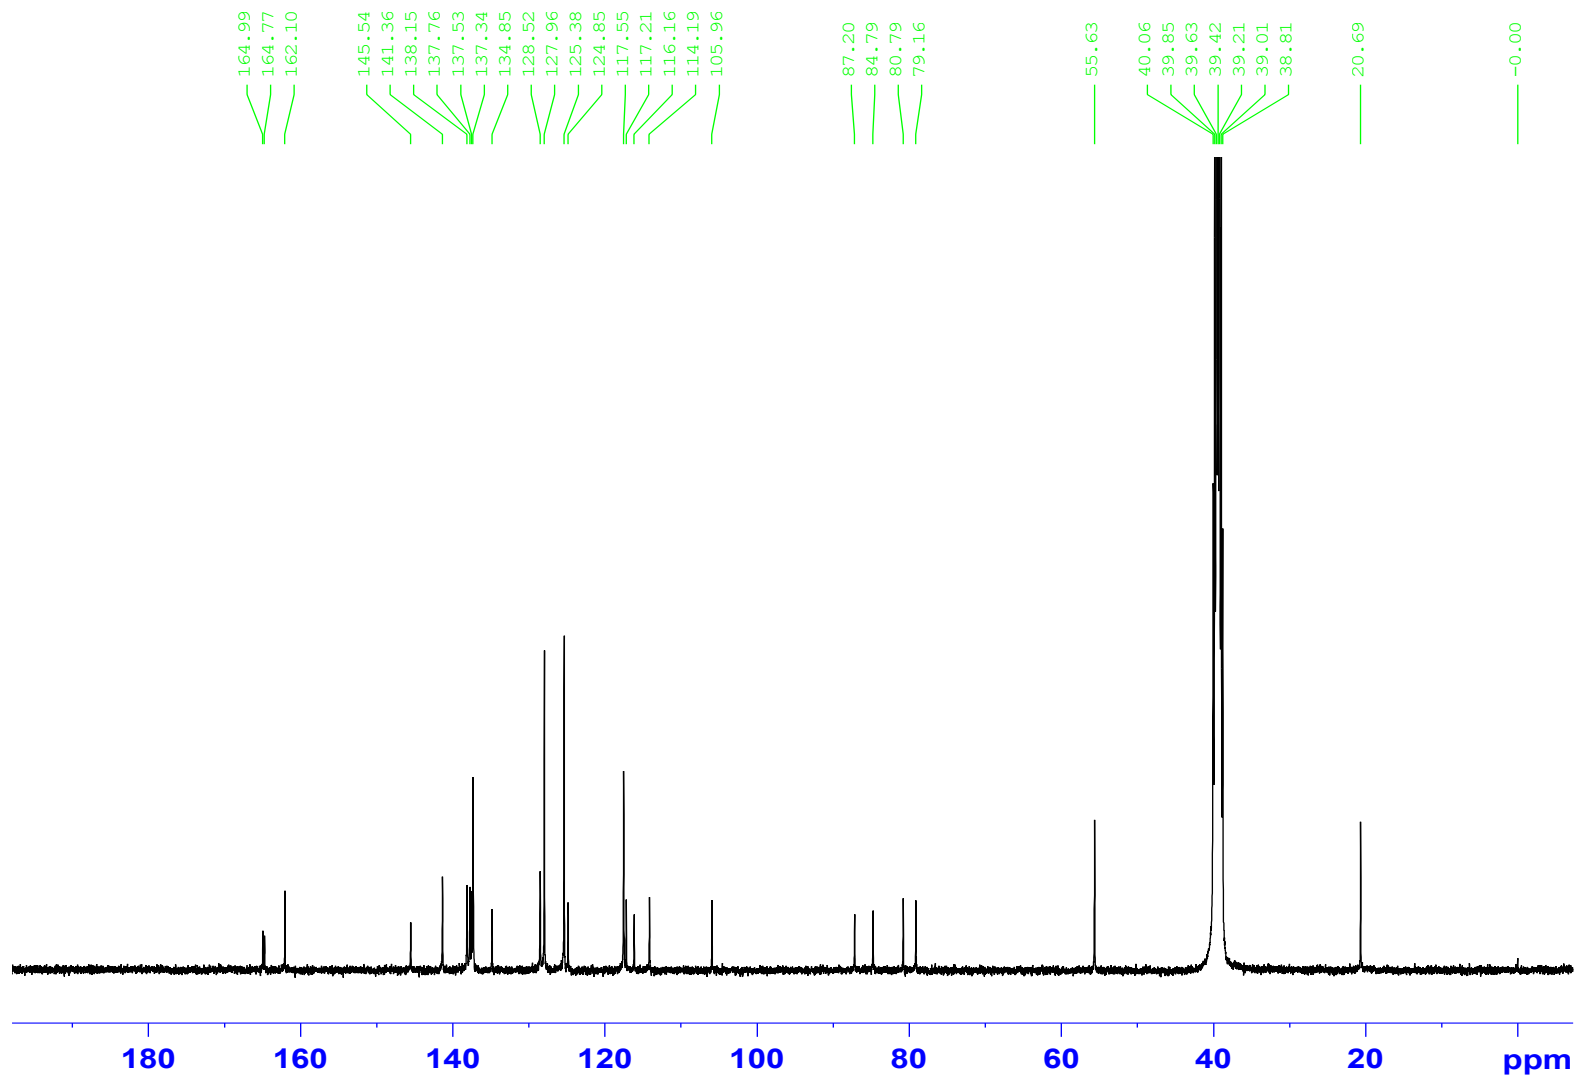

## Appendix 2. Selected radio-HPLC chromatograms

### 2.1. Syntheses of [ $^{18}\text{F}$ ]2a-c in micro-reactor

#### 2.1.1. [ $^{18}\text{F}$ ]2a from 8a

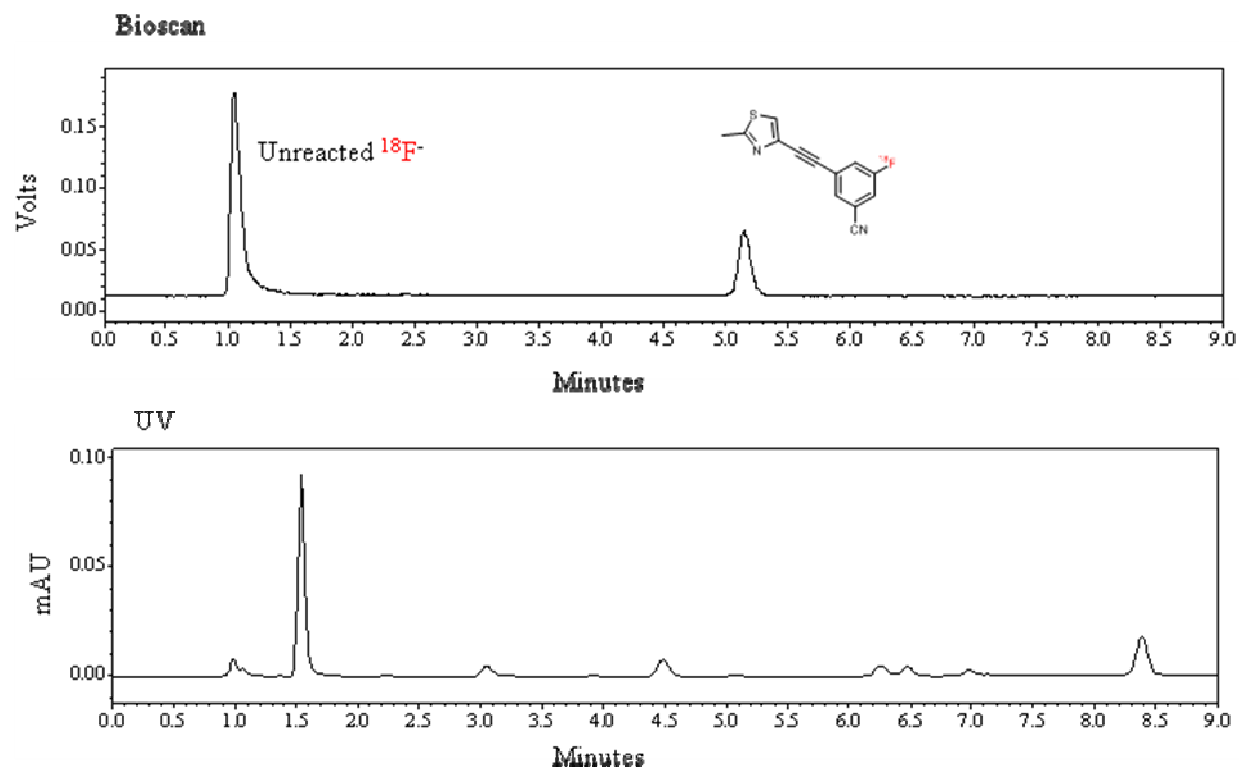

### 2.1.2. [ $^{18}\text{F}$ ]2b from 8b

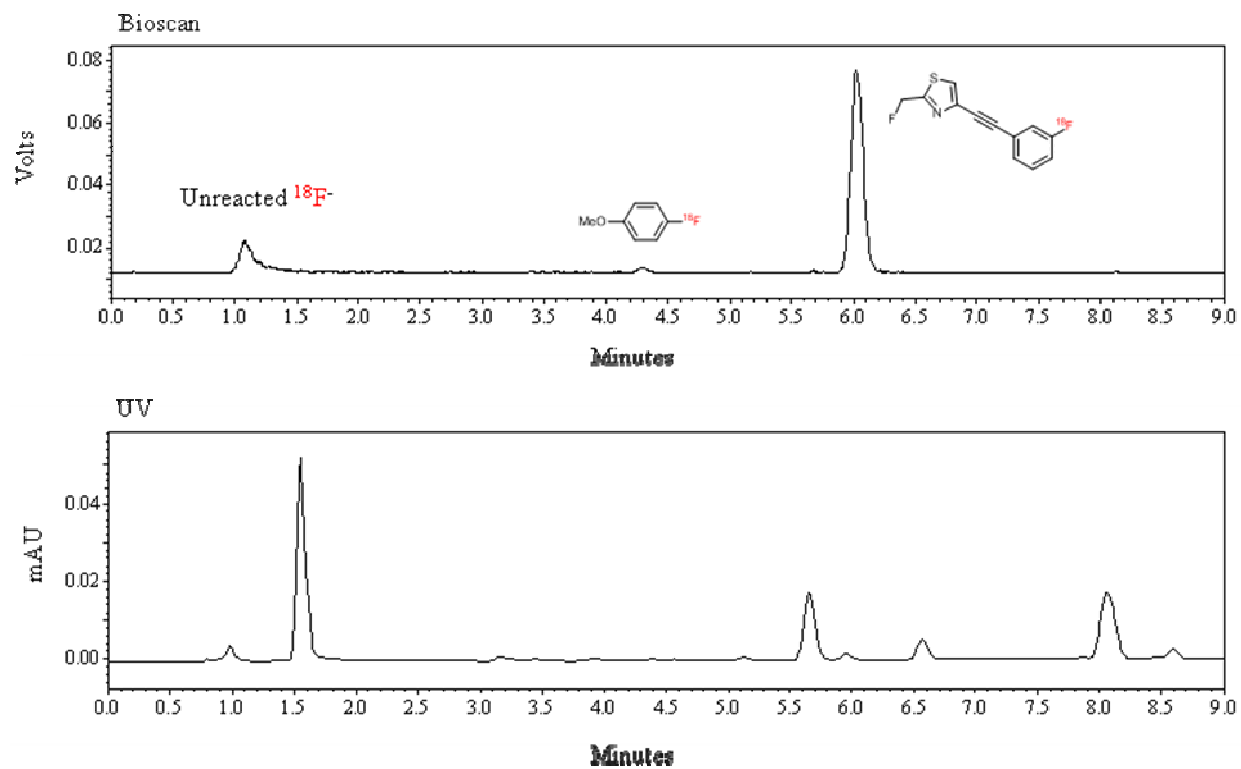



### 2.1.3. [ $^{18}\text{F}$ ]2c from bromo-precursor 5e

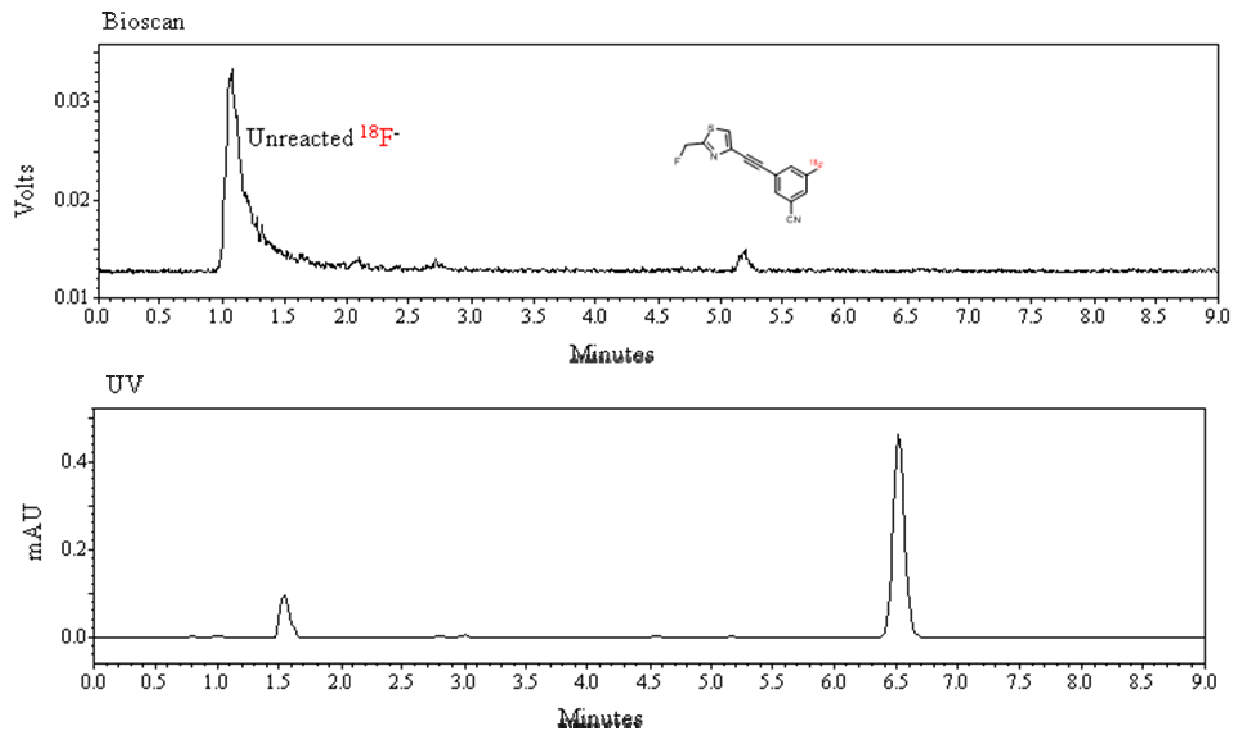

### 2.1.4. [<sup>18</sup>F]2c from 7c

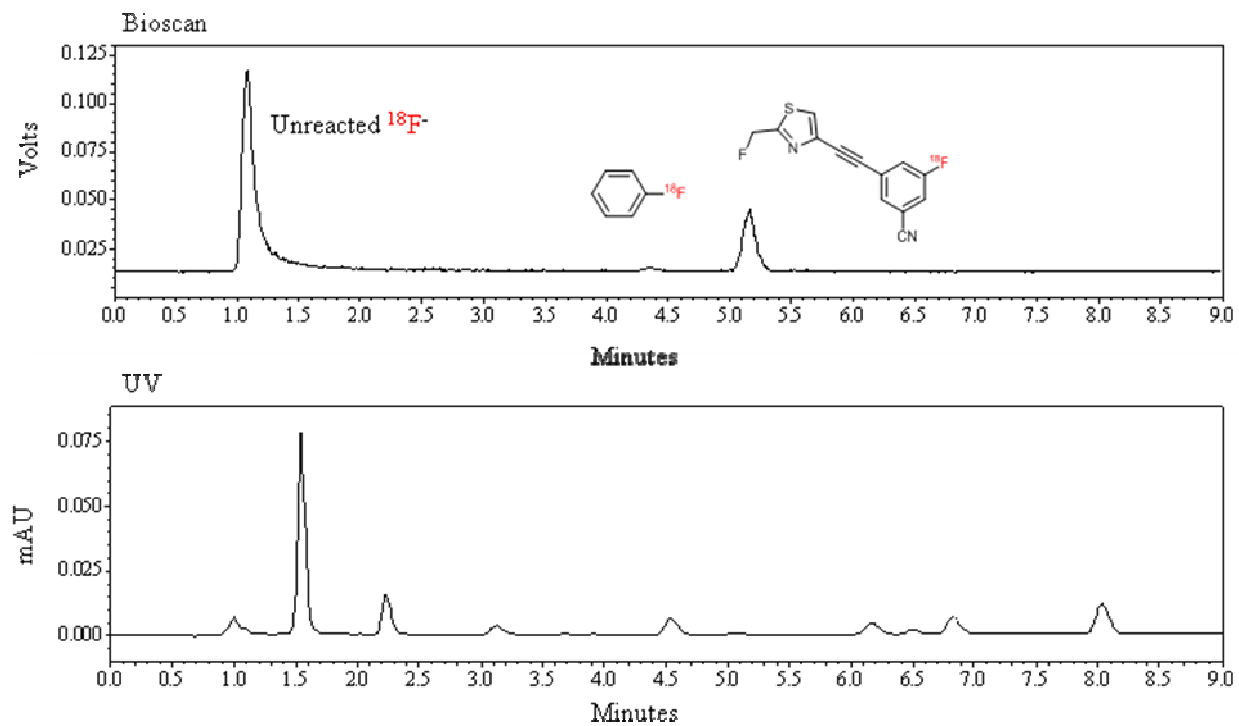

2.2.1. With separate infusion of **7c** and [ $^{18}\text{F}$ ]F $^{-}$ -K $^{+}$ -K 2.2.2 on production activity scale in micro-reactor

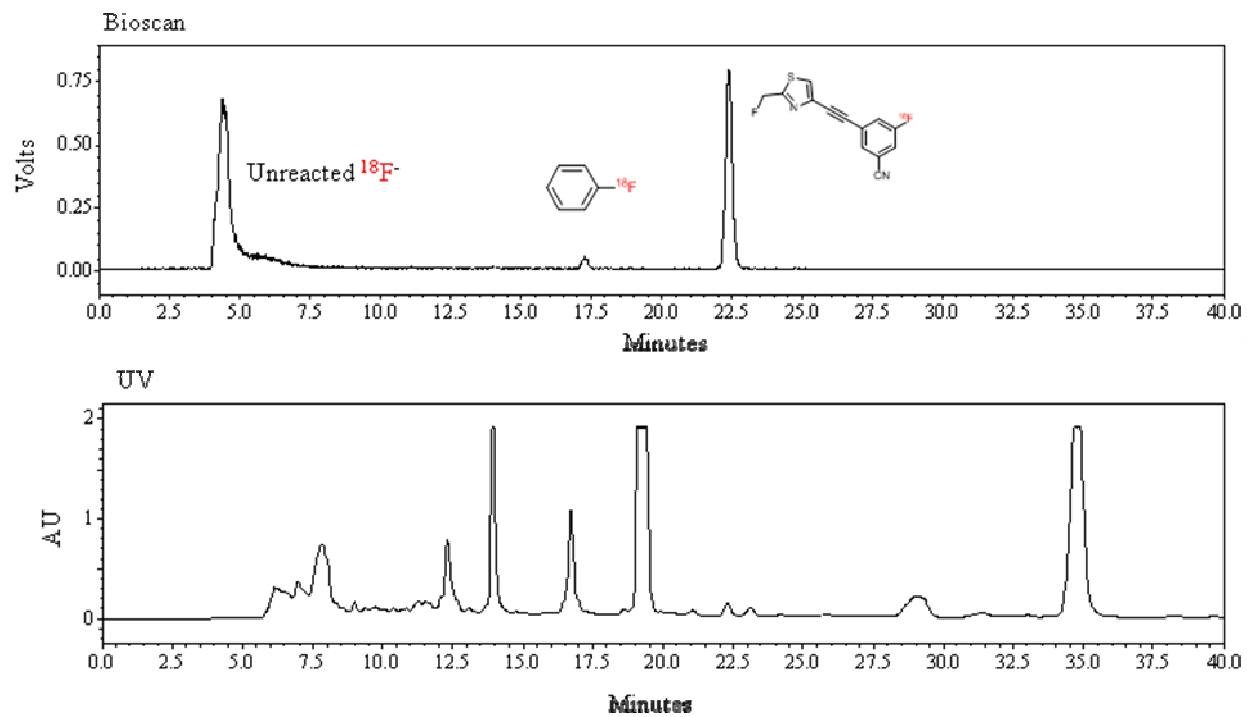

2.2.2. With infusion of premixed **7c** and [ $^{18}\text{F}$ ]F $^{-}$ -K $^{+}$ -K 2.2.2 on production activity scale in micro-reactor

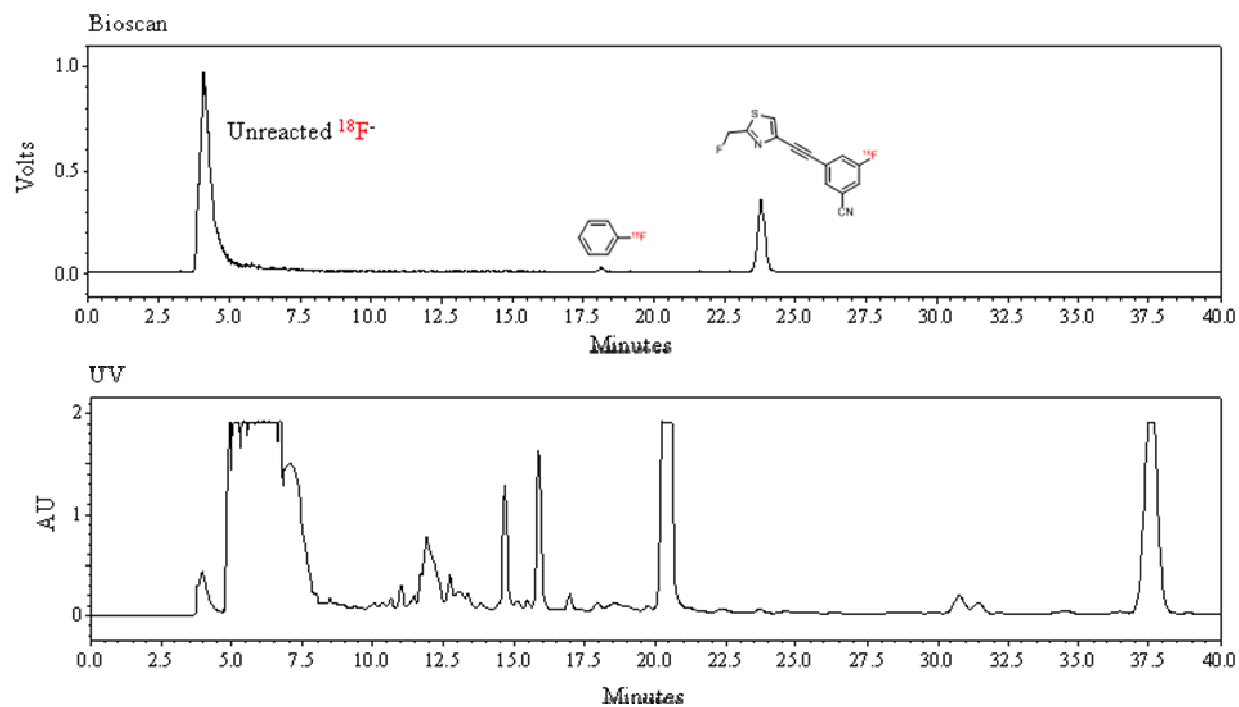

## 2.3. Syntheses of [ $^{18}\text{F}$ ]2a-c in a Synthia module

### 2.3.1. [ $^{18}\text{F}$ ]2a from 8a

#### a. Semi-preparative HPLC chromatogram

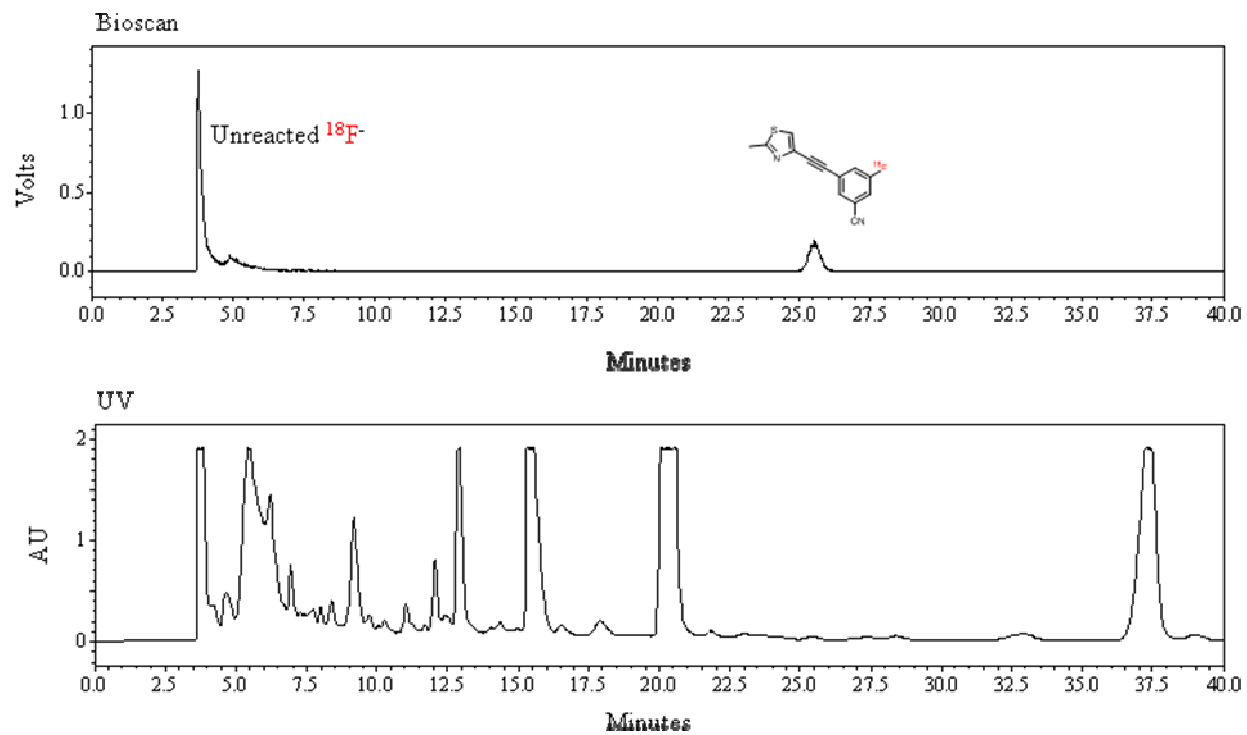

b. Analytical HPLC chromatogram of the [ $^{18}\text{F}$ ]2a for measurement of specific radioactivity

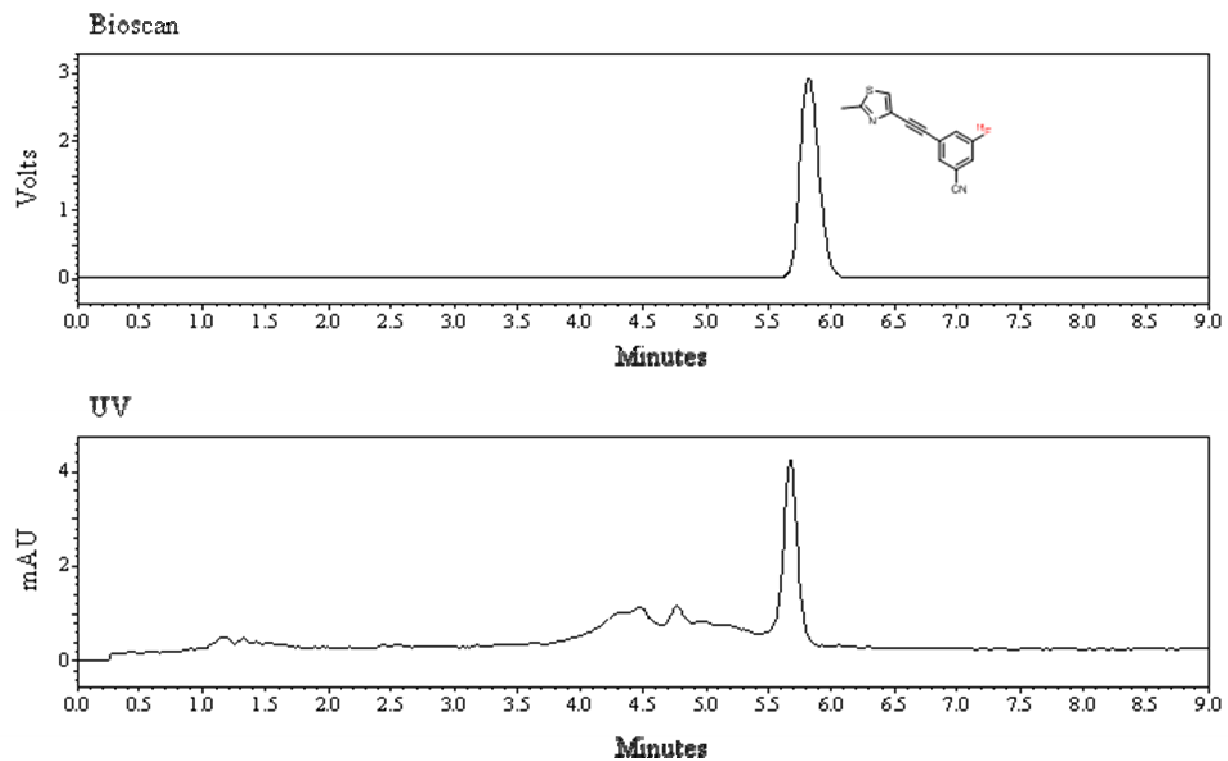

Note: Radio-peaks are ~ 0.2 min behind corresponding UV peaks due to configuration in Bioscan and UV detectors.

### 2.3.2. [<sup>18</sup>F]2b from 8b

#### a. Semi-preparative HPLC chromatogram

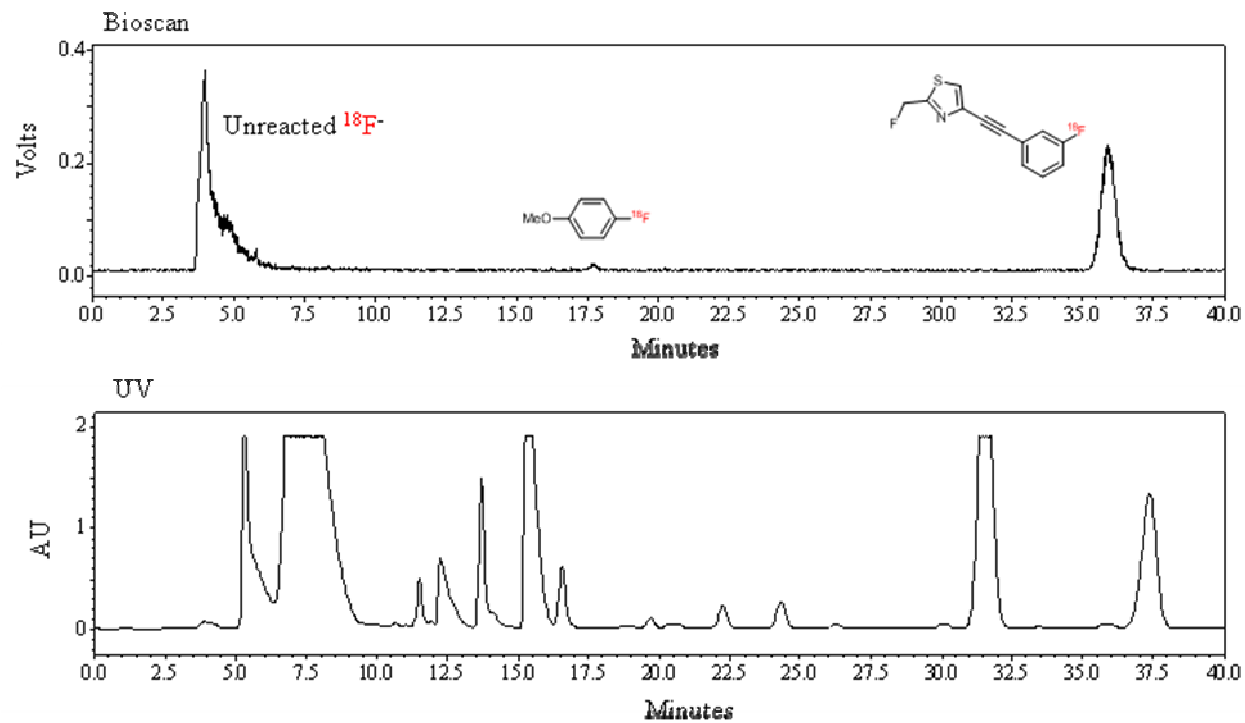

b. Analytical HPLC chromatogram of the [ $^{18}\text{F}$ ]2b

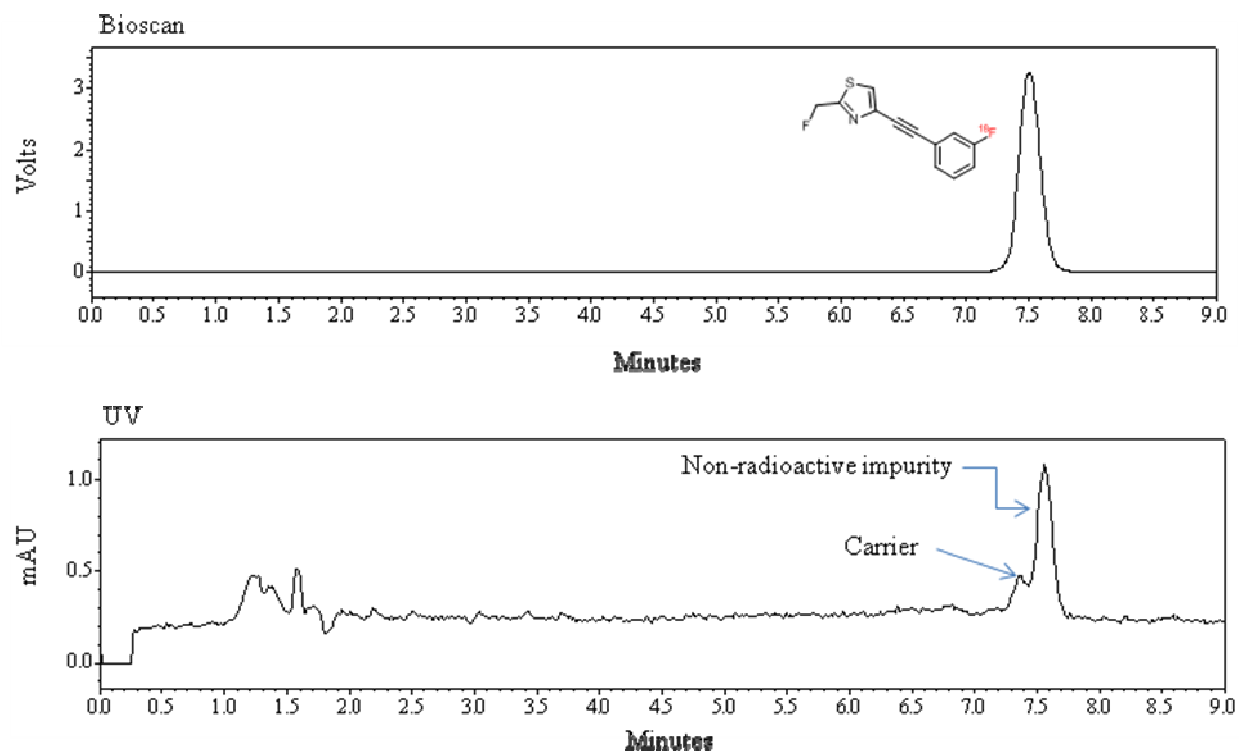



### 2.3.3. [ $^{18}\text{F}$ ]2c from 7c

#### a. Semi-preparative HPLC chromatogram

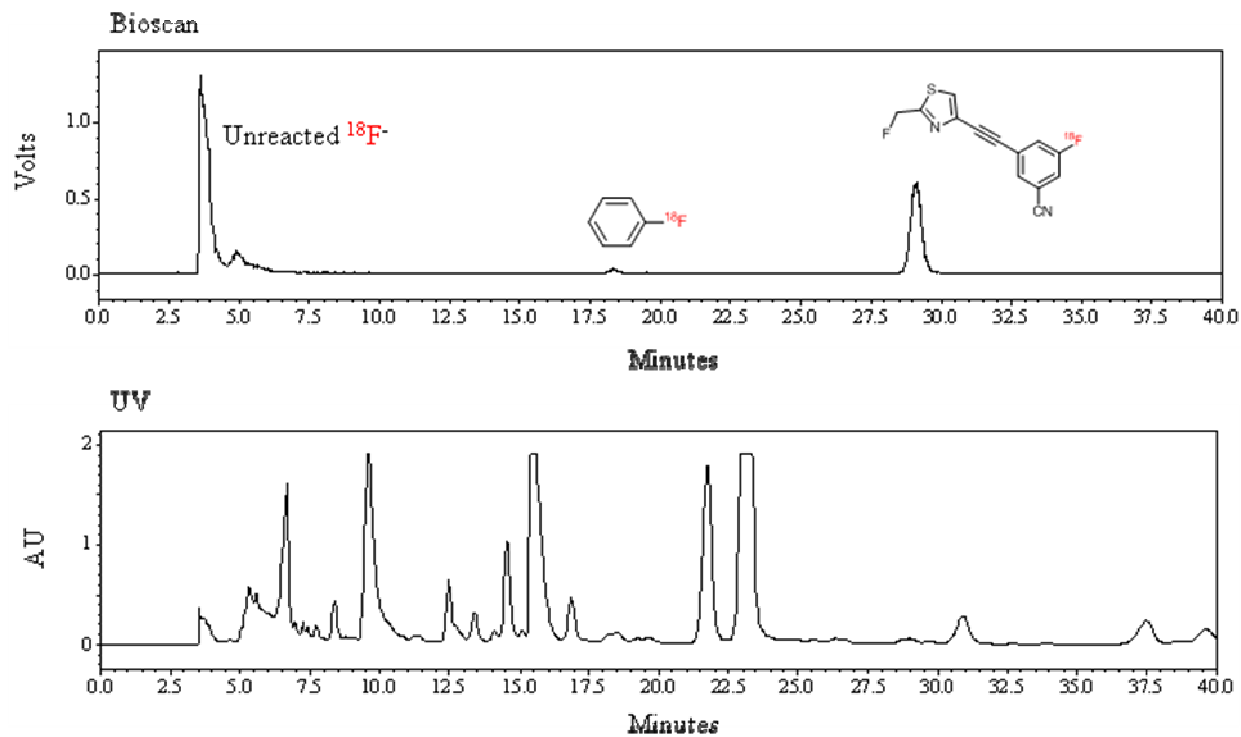

b. Analytical HPLC chromatogram of the [ $^{18}\text{F}$ ]2c

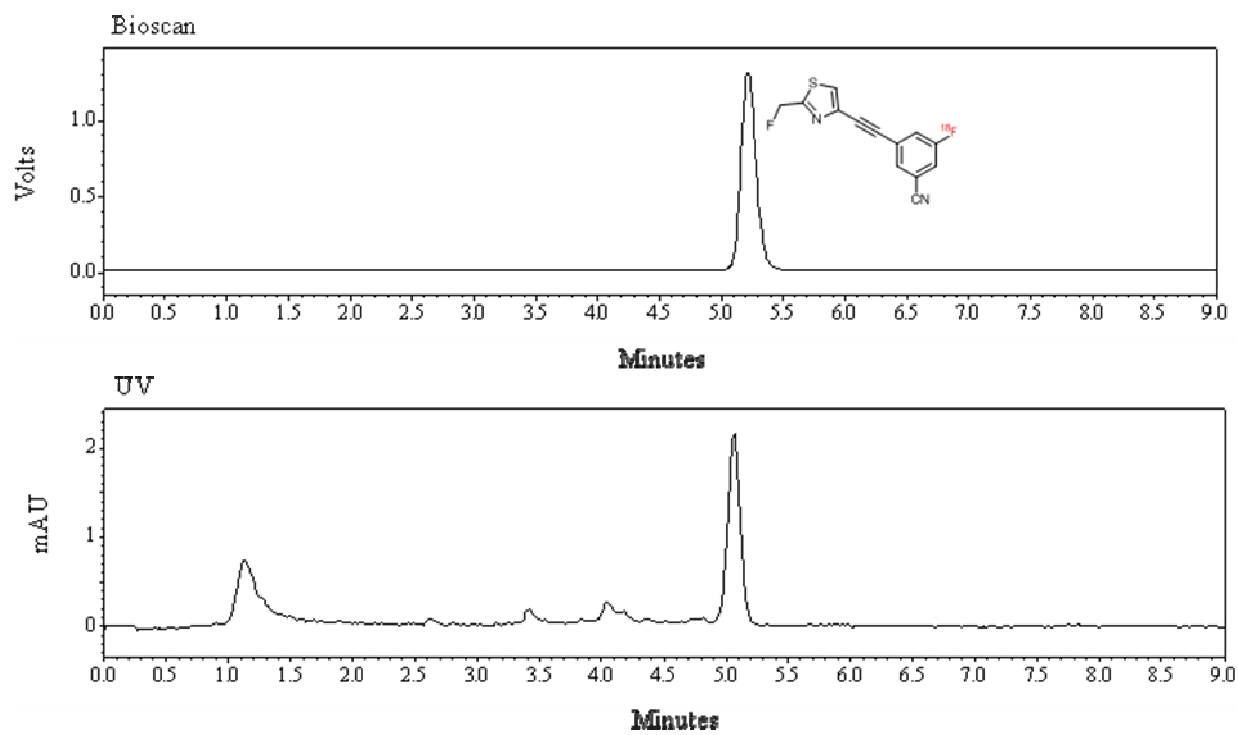

Supplement: c1ob05555k.pdf [file c1ob05555k.pdf]
